# Supplementary material for: Analyses of mRNA Profiling through RNA Sequencing on a SAMP8 Mouse Model in Response to Ginsenoside Rg1 and Rb1 Treatment
Source: Front Pharmacol. 2017 Feb 27;8:88. doi: 10.3389/fphar.2017.00088 (PMC5326756; doi:10.3389/fphar.2017.00088)
Supplement: Supplementary file 2 [file Table2.XLSX]

## Sheet: Supplementary Table S2
Significantly differentially expressed mRNA transcripts in SAMP8 and SAMP8+GRg1 mice
transcript_id	gene_id	gene_name	length	SAMP8+GRg1_FPKM	SAMP8+vehicle_FPKM	pvalue
ENSMUST00000105583	ENSMUSG00000023286	Ube2j2	1434	7.39162	4.33569	0.00475
ENSMUST00000105581	ENSMUSG00000023286	Ube2j2	1391	5.96962	10.3951	0.01165
ENSMUST00000035194	ENSMUSG00000032577	Mapkapk3	2816	0.719543	0.46957	0.0105
ENSMUST00000159592	ENSMUSG00000042121	Ssh1	8436	2.15197	1.80768	0.04535
ENSMUST00000079413	ENSMUSG00000024222	Fkbp5	3542	7.11822	8.35943	0.04345
ENSMUST00000207023	ENSMUSG00000053470	Kdm3a	4753	3.15912	6.01598	0.0034
ENSMUST00000052168	ENSMUSG00000043415	Otud1	2832	6.33074	8.20455	0.00085
ENSMUST00000087864	ENSMUSG00000037355	Uvssa	7326	1.51957	1.18977	0.01515
ENSMUST00000168828	ENSMUSG00000000552	Zfp385a	2291	4.34514	5.48263	0.00805
ENSMUST00000025357	ENSMUSG00000024480	Ap3s1	1479	30.5161	35.3246	0.0418
ENSMUST00000029633	ENSMUSG00000028004	Npy2r	3364	1.11187	2.24881	0.00045
ENSMUST00000170788	ENSMUSG00000027777	Schip1	1730	108.097	133.551	0.00415
ENSMUST00000056153	ENSMUSG00000044788	Fads6	4951	5.87233	4.80383	0.00735
ENSMUST00000025992	ENSMUSG00000036225	Kctd1	1772	10.2525	13.5928	0.03155
ENSMUST00000132298	ENSMUSG00000093485	Gm20708	1780	0.523284	0.0675803	0.01605
ENSMUST00000110369	ENSMUSG00000021342	Prl	895	0	0.407846	0.04715
ENSMUST00000078547	ENSMUSG00000061536	Sec22c	5656	2.15359	2.96962	0.00465
ENSMUST00000090277	ENSMUSG00000068617	Efcab1	2494	3.78076	4.62138	0.02385
ENSMUST00000029987	ENSMUSG00000028307	Aldob	2016	0.574974	0.342828	0.01435
ENSMUST00000189672	ENSMUSG00000096856	Gm10778	4735	0.484505	0.640886	0.02975
ENSMUST00000007139	ENSMUSG00000006941	Eif1b	917	82.3383	100.829	0.00375
ENSMUST00000029030	ENSMUSG00000027524	Edn3	3117	1.84116	1.43659	0.0264
ENSMUST00000068156	ENSMUSG00000046230	Vps13a	9656	21.5053	25.4921	0.009
ENSMUST00000031276	ENSMUSG00000029333	Rasgef1b	2990	14.8333	10.6635	0.0039
ENSMUST00000011450	ENSMUSG00000011306	Sugp1	2287	20.434	16.5814	0.0032
ENSMUST00000101029	ENSMUSG00000037679	Inf2	4600	11.6322	13.6918	0.0202
ENSMUST00000116349	ENSMUSG00000020868	Xylt2	3442	7.2677	5.71832	0.00205
ENSMUST00000055575	ENSMUSG00000050188	Lsm10	943	4.77553	6.2169	0.04755
ENSMUST00000152247	ENSMUSG00000039477	Tnrc18	9342	3.16046	4.01292	0.00505
ENSMUST00000189457	ENSMUSG00000101972	Hist1h3i	411	27.7085	35.444	0.0224
ENSMUST00000042944	ENSMUSG00000024451	Arap3	5224	0.897742	0.713781	0.0415
ENSMUST00000022518	ENSMUSG00000021951	N6amt2	836	23.4653	27.8293	0.03755
ENSMUST00000090071	ENSMUSG00000050211	Pla2g4e	4477	9.82195	8.30821	0.02985
ENSMUST00000034136	ENSMUSG00000031700	Gpt2	3639	13.4045	16.5068	0.00315
ENSMUST00000110961	ENSMUSG00000037017	Zscan21	2310	2.75844	4.7215	0.00205
ENSMUST00000169397	ENSMUSG00000024327	Slc39a7	2107	1.9846	5.97795	0.0222
ENSMUST00000031984	ENSMUSG00000029920	Smarcad1	5168	6.24378	8.35852	0.00285
ENSMUST00000026270	ENSMUSG00000025240	Sacm1l	3433	36.5545	43.4772	0.0089
ENSMUST00000022204	ENSMUSG00000021693	Kif2a	5304	10.9286	13.1274	0.03755
ENSMUST00000022207	ENSMUSG00000021696	Elovl7	5435	2.20212	1.85285	0.0458
ENSMUST00000112840	ENSMUSG00000023965	Fbxl17	3667	10.6645	14.2055	0.00165
ENSMUST00000080936	ENSMUSG00000012114	Med15	3263	4.76433	6.10626	0.0299
ENSMUST00000186219	ENSMUSG00000072774	Zfp951	2904	0.428568	0.193768	0.0026
ENSMUST00000023829	ENSMUSG00000023067	Cdkn1a	1910	1.68594	2.52929	0.00075
ENSMUST00000068333	ENSMUSG00000026245	Farsb	1951	26.8971	32.1658	0.0379
ENSMUST00000160704	ENSMUSG00000030329	Pianp	1116	2.31576	4.28613	0.0431
ENSMUST00000074653	ENSMUSG00000047466	8030462N17Rik	3418	15.9751	18.7056	0.02095
ENSMUST00000112992	ENSMUSG00000026883	Dab2ip	6184	2.39015	0.825795	0.0422
ENSMUST00000043896	ENSMUSG00000038872	Zfhx3	16433	0.636484	0.792094	0.0124
ENSMUST00000031695	ENSMUSG00000029684	Wasl	4352	23.6891	28.5548	0.00625
ENSMUST00000048187	ENSMUSG00000037166	Ppp1r14a	531	27.5169	20.484	0.0028
ENSMUST00000023132	ENSMUSG00000022489	Pde1b	2954	99.3678	86.6426	0.0356
ENSMUST00000023133	ENSMUSG00000022490	Ppp1r1a	1295	25.898	21.5828	0.0173
ENSMUST00000128187	ENSMUSG00000029328	Hnrnpdl	2752	44.1325	31.3629	0.00185
ENSMUST00000122120	ENSMUSG00000059187	Fam19a1	3252	13.179	15.6794	0.0269
ENSMUST00000036578	ENSMUSG00000040007	Bahd1	4594	6.62271	7.77174	0.0287
ENSMUST00000044250	ENSMUSG00000042650	Alkbh5	5730	12.1835	13.997	0.0415
ENSMUST00000034316	ENSMUSG00000031853	BC021891	5692	1.33178	0.64962	5e-05
ENSMUST00000051053	ENSMUSG00000044949	Ubtd2	1012	10.8356	13.1492	0.0274
ENSMUST00000112198	ENSMUSG00000042207	Kdm5b	5413	12.9021	15.8742	0.01905
ENSMUST00000033905	ENSMUSG00000031508	Ankrd10	2286	10.5849	12.9452	0.02045
ENSMUST00000054399	ENSMUSG00000045969	Ing1	2813	8.27228	10.5345	0.00135
ENSMUST00000058868	ENSMUSG00000036411	9530077C05Rik	2155	3.88271	4.69561	0.0336
ENSMUST00000171400	ENSMUSG00000090291	Lrrc10b	2077	16.7251	13.1518	0.0016
ENSMUST00000010188	ENSMUSG00000010044	Zmynd10	1765	1.74263	1.20091	0.0468
ENSMUST00000074241	ENSMUSG00000054474	Thnsl2	1821	0.751695	0.322972	0.0417
ENSMUST00000107986	ENSMUSG00000012640	Zfp715	4184	8.47821	10.242	0.0226
ENSMUST00000030830	ENSMUSG00000028980	H6pd	4745	2.69514	1.80561	0.0371
ENSMUST00000040330	ENSMUSG00000038215	Cep44	1690	3.13006	4.0329	0.0364
ENSMUST00000082175	ENSMUSG00000073968	Trim68	2389	1.48024	1.10352	0.0214
ENSMUST00000041139	ENSMUSG00000036943	Rab8b	4743	13.4785	16.9427	0.0008
ENSMUST00000020024	ENSMUSG00000019874	Fabp7	804	80.3813	67.6485	0.0176
ENSMUST00000015138	ENSMUSG00000029675	Eln	3853	1.13185	0.76946	0.0089
ENSMUST00000036247	ENSMUSG00000033707	Lrrc24	1758	6.96918	4.821	0.03865
ENSMUST00000113952	ENSMUSG00000026917	Wdr5	2890	9.89816	11.4848	0.0442
ENSMUST00000113482	ENSMUSG00000026843	Fubp3	3268	6.33535	4.94046	0.04565
ENSMUST00000100723	ENSMUSG00000072473	1700024G13Rik	398	0.601415	0	0.02395
ENSMUST00000041623	ENSMUSG00000041773	Enc1	4742	142.95	167.817	0.01315
ENSMUST00000030127	ENSMUSG00000028420	Tmem38b	2862	1.84378	2.59573	0.00195
ENSMUST00000174499	ENSMUSG00000053046	Brsk2	4223	12.3022	8.45557	0.01505
ENSMUST00000059320	ENSMUSG00000083695	Rnf138rt1	1191	0.453319	0.828186	0.01495
ENSMUST00000049583	ENSMUSG00000060862	Zbtb40	7192	1.40815	2.17772	5e-05
ENSMUST00000020118	ENSMUSG00000019960	Dusp6	2796	21.6033	31.782	5e-05
ENSMUST00000032185	ENSMUSG00000030096	Slc6a6	6186	21.2499	16.5658	0.0005
ENSMUST00000041551	ENSMUSG00000037257	Aagab	2600	29.3099	33.8299	0.0345
ENSMUST00000033695	ENSMUSG00000031333	Abcb7	5667	16.3104	18.6912	0.0412
ENSMUST00000041558	ENSMUSG00000029505	Ep400	10608	2.61611	3.64369	0.0395
ENSMUST00000115870	ENSMUSG00000024240	Epc1	3817	8.11988	6.41694	0.02645
ENSMUST00000156568	ENSMUSG00000022704	Qtrtd1	3856	1.66235	1.07223	0.02175
ENSMUST00000103164	ENSMUSG00000076435	Acsf2	3154	2.00906	1.63136	0.0439
ENSMUST00000020967	ENSMUSG00000020639	Pfn4	1306	4.05713	3.19124	0.045
ENSMUST00000171041	ENSMUSG00000018442	Derl2	1466	1.83194	4.22813	0.01885
ENSMUST00000023486	ENSMUSG00000022797	Tfrc	4890	36.5514	29.2741	0.00105
ENSMUST00000139467	ENSMUSG00000042672	Dcst1	2306	1.49842	1.09737	0.01885
ENSMUST00000106373	ENSMUSG00000030711	Sult1a1	1289	4.49477	5.94579	0.04075
ENSMUST00000180430	ENSMUSG00000061578	Ksr2	13125	4.90774	6.01865	0.00425
ENSMUST00000041314	ENSMUSG00000037058	Paip2	1475	91.6693	106.416	0.0265
ENSMUST00000036331	ENSMUSG00000035239	Neu3	3341	1.16925	0.805622	0.0026
ENSMUST00000021646	ENSMUSG00000021223	Papln	4260	0.612865	0.338232	0.02715
ENSMUST00000105911	ENSMUSG00000049649	Gpr3	2518	1.12195	1.89287	0.0065
ENSMUST00000036424	ENSMUSG00000032807	Alox12b	2431	0.766912	1.03265	0.04035
ENSMUST00000172403	ENSMUSG00000042632	Pla2g6	2943	2.80857	1.69761	0.0236
ENSMUST00000062153	ENSMUSG00000029392	Rilpl1	2249	22.1443	25.8469	0.0313
ENSMUST00000113310	ENSMUSG00000026819	Slc25a25	3278	3.49176	5.55235	0.02385
ENSMUST00000080440	ENSMUSG00000021820	Camk2g	3670	22.1478	15.1553	0.01105
ENSMUST00000046254	ENSMUSG00000040490	Lrfn2	3202	7.60464	8.86911	0.0405
ENSMUST00000046255	ENSMUSG00000032641	Gpr19	1610	1.77366	3.35077	0.03805
ENSMUST00000172330	ENSMUSG00000031284	Pak3	8135	15.5822	21.0601	0.01645
ENSMUST00000053177	ENSMUSG00000043940	Wdfy3	14274	17.5388	20.2303	0.0382
ENSMUST00000047783	ENSMUSG00000033282	Rpgrip1l	7009	5.15289	6.40433	0.00325
ENSMUST00000183255	ENSMUSG00000033147	Slc22a15	2265	0.512875	0.190582	0.0297
ENSMUST00000106100	ENSMUSG00000039068	Zzz3	7607	6.28257	9.00484	0.0337
ENSMUST00000038794	ENSMUSG00000001229	Dpp9	3509	9.56211	11.099	0.0396
ENSMUST00000055322	ENSMUSG00000056708	Ier5	3276	21.2846	31.2224	5e-05
ENSMUST00000110208	ENSMUSG00000068264	Ap5s1	1521	6.34451	4.32026	0.0056
ENSMUST00000180502	ENSMUSG00000096916	Zfp850	6163	2.19807	2.67387	0.03295
ENSMUST00000183324	ENSMUSG00000041258	Zfp236	3227	0.309169	0.773548	0.03145
ENSMUST00000149019	ENSMUSG00000017119	Nbr1	3330	2.39426	5.30112	0.02515
ENSMUST00000025183	ENSMUSG00000024325	Ring1	2034	6.49453	5.10407	0.01065
ENSMUST00000161600	ENSMUSG00000038174	Fam126b	8685	35.1803	43.7725	0.00255
ENSMUST00000109102	ENSMUSG00000031758	Cdyl2	8087	4.88561	5.85474	0.0109
ENSMUST00000166381	ENSMUSG00000090546	Cdr1	2313	15.8877	22.194	0.00055
ENSMUST00000109109	ENSMUSG00000031767	Nudt7	2795	0.739669	0.381882	0.0235
ENSMUST00000023143	ENSMUSG00000022500	Litaf	2235	6.36145	5.12951	0.0209
ENSMUST00000029199	ENSMUSG00000027663	Zmat3	7797	4.64386	9.05176	0.0005
ENSMUST00000087497	ENSMUSG00000024330	Col11a2	6048	1.877	1.35668	0.004
ENSMUST00000023069	ENSMUSG00000022434	Fam118a	2543	11.7463	13.6272	0.0447
ENSMUST00000042771	ENSMUSG00000035673	Sbno2	4227	1.87822	1.56012	0.04955
ENSMUST00000148477	ENSMUSG00000062563	Cys1	790	1.42903	2.49362	0.04895
ENSMUST00000139263	ENSMUSG00000027639	Samhd1	2036	0.785661	1.43047	0.0421
ENSMUST00000029515	ENSMUSG00000027907	S100a11	511	6.63641	1.91022	5e-05
ENSMUST00000039554	ENSMUSG00000037376	Trmt6	2828	9.77545	7.69929	0.0166
ENSMUST00000067664	ENSMUSG00000020849	Ywhae	2100	118.936	101.202	0.0335
ENSMUST00000110686	ENSMUSG00000054484	Tmem62	2417	3.5936	2.35625	0.04135
ENSMUST00000022746	ENSMUSG00000022146	Osmr	5491	0.629558	0.827507	0.0225
ENSMUST00000064795	ENSMUSG00000038418	Egr1	4484	4.2691	8.20819	5e-05
ENSMUST00000026084	ENSMUSG00000025094	Slc18a2	3803	2.33706	3.01811	0.00445
ENSMUST00000067689	ENSMUSG00000047888	Tnrc6b	17327	9.16652	10.4343	0.04475
ENSMUST00000108180	ENSMUSG00000040270	Bach2	8882	0.852683	1.08863	0.0093
ENSMUST00000054960	ENSMUSG00000051495	Irf2bp2	5080	15.1345	19.3279	0.00035
ENSMUST00000097981	ENSMUSG00000073802	Cdkn2b	1393	0.518118	0.293185	0.0346
ENSMUST00000115318	ENSMUSG00000043079	Synpo	4479	17.6242	24.3548	0.00195
ENSMUST00000069325	ENSMUSG00000034706	Dnaic2	2874	0.602233	0.369334	0.0303
ENSMUST00000033827	ENSMUSG00000031450	Grk1	7425	1.09328	0.856363	0.01095
ENSMUST00000069926	ENSMUSG00000046699	Slitrk4	8494	10.3785	12.3151	0.04585
ENSMUST00000026262	ENSMUSG00000025232	Hexa	1865	26.7375	32.2253	0.00805
ENSMUST00000114313	ENSMUSG00000026031	Cflar	6572	3.71905	4.67678	0.01115
ENSMUST00000084731	ENSMUSG00000066232	Ipo7	3117	55.9565	64.4062	0.0456
ENSMUST00000030025	ENSMUSG00000028341	Nr4a3	5720	0.512149	0.963165	0.0219
ENSMUST00000081525	ENSMUSG00000037348	Paqr7	2351	17.4966	20.9813	0.02915
ENSMUST00000156291	ENSMUSG00000024742	Fen1	2373	1.77876	3.88904	0.02205
ENSMUST00000054491	ENSMUSG00000046470	Sox18	1620	1.2378	1.95412	0.00185
ENSMUST00000030028	ENSMUSG00000028343	Erp44	2624	12.7405	15.6884	0.00415
ENSMUST00000122936	ENSMUSG00000024114	Prss41	1088	0.508834	0.0641167	0.0393
ENSMUST00000034787	ENSMUSG00000032253	Phip	10756	15.2417	18.4815	0.0137
ENSMUST00000062609	ENSMUSG00000054931	Zkscan4	2400	3.22014	2.6316	0.04095
ENSMUST00000048192	ENSMUSG00000041840	Haus1	1004	7.68867	6.15857	0.0328
ENSMUST00000114912	ENSMUSG00000031109	Enox2	3167	0.616816	1.24501	0.03545
ENSMUST00000020908	ENSMUSG00000057469	E2f6	2421	10.5461	12.8322	0.0109
ENSMUST00000060419	ENSMUSG00000046623	Gjb4	1445	1.96681	2.63733	0.0229
ENSMUST00000034303	ENSMUSG00000031843	Mphosph6	1054	11.9861	9.89541	0.0336
ENSMUST00000034650	ENSMUSG00000032135	Mcam	2989	5.69249	4.30102	0.0222
ENSMUST00000027601	ENSMUSG00000026355	Mcm6	2910	0.849649	0.520329	0.00225
ENSMUST00000146451	ENSMUSG00000050705	2310061I04Rik	2081	1.08154	0.354801	0.0328
ENSMUST00000020904	ENSMUSG00000020580	Rock2	8012	52.3602	59.8071	0.0402
ENSMUST00000037472	ENSMUSG00000035545	Leng8	5105	12.5569	8.11239	5e-05
ENSMUST00000045864	ENSMUSG00000040247	Tbc1d10c	1758	0.536004	0.211106	0.002
ENSMUST00000082414	ENSMUSG00000064363	mt-Nd4	1378	438.397	348.318	0.00065
ENSMUST00000020692	ENSMUSG00000020423	Btg2	2743	18.9111	10.6174	5e-05
ENSMUST00000188151	ENSMUSG00000028936	Rpl22	2048	28.4397	3.00074	0.01035
ENSMUST00000000122	ENSMUSG00000000120	Ngfr	3446	0.864327	0.622366	0.0158
ENSMUST00000121357	ENSMUSG00000040111	Gramd1b	7334	16.3012	20.3423	0.0035
ENSMUST00000113123	ENSMUSG00000038696	Mapkap1	1530	2.2636	5.19564	0.0157
ENSMUST00000020057	ENSMUSG00000019906	Lin7a	5875	16.9138	20.629	0.00785
ENSMUST00000107994	ENSMUSG00000074158	9830147E19Rik	4868	1.34683	1.07903	0.0381
ENSMUST00000041639	ENSMUSG00000096054	Syne1	6982	52.1767	61.3374	0.01075
ENSMUST00000146385	ENSMUSG00000032878	Ccdc85a	3798	5.44622	7.43947	0.0138
ENSMUST00000066819	ENSMUSG00000054034	Tceal5	1044	41.7815	34.4738	0.00895
ENSMUST00000086278	ENSMUSG00000066829	Zfp810	3238	9.9697	7.76085	0.0009
ENSMUST00000054030	ENSMUSG00000024866	Acy3	1505	0.755125	0.42461	0.01035
ENSMUST00000111964	ENSMUSG00000059005	Hnrnpa3	1654	22.6384	12.1834	0.0188
ENSMUST00000061328	ENSMUSG00000045314	Sowahb	3900	4.73578	6.29513	0.0002
ENSMUST00000059193	ENSMUSG00000048376	F2r	3307	2.81873	2.29274	0.025
ENSMUST00000027337	ENSMUSG00000026153	Fam135a	5536	7.58487	6.11383	0.0288
ENSMUST00000032451	ENSMUSG00000030307	Slc6a11	4132	25.1867	19.9746	0.00075
ENSMUST00000063542	ENSMUSG00000022698	Naa50	2136	4.54482	8.57695	0.0111
ENSMUST00000020478	ENSMUSG00000020246	Hcfc2	3422	8.32094	10.5714	0.01435
ENSMUST00000066497	ENSMUSG00000051469	Zfp191	5732	10.1919	12.1271	0.02625
ENSMUST00000103179	ENSMUSG00000018401	Mtmr4	5753	21.3271	25.5789	0.0086
ENSMUST00000102484	ENSMUSG00000078515	Ddi2	9553	7.12858	8.30873	0.04785
ENSMUST00000004574	ENSMUSG00000004460	Dnajb11	1927	26.2548	32.6269	0.00285
ENSMUST00000101118	ENSMUSG00000072872	Rybp	4503	12.5169	14.9104	0.01435
ENSMUST00000124308	ENSMUSG00000036046	5031439G07Rik	5106	5.44105	3.36547	0.0111
ENSMUST00000014505	ENSMUSG00000014361	Mertk	4302	6.45199	8.09457	0.0024
ENSMUST00000139717	ENSMUSG00000057421	Las1l	4625	1.33168	0.856758	0.0393
ENSMUST00000050735	ENSMUSG00000049421	Zfp260	4006	16.1287	20.8941	0.00415
ENSMUST00000084289	ENSMUSG00000042500	Ago4	6537	2.57678	3.0451	0.03345
ENSMUST00000047425	ENSMUSG00000041308	Sntb2	4423	5.09147	7.29121	5e-05
ENSMUST00000019906	ENSMUSG00000019772	Vip	1527	34.3514	41.1237	0.01185
ENSMUST00000109488	ENSMUSG00000044349	Snhg11	5864	104.229	83.3598	0.00075
ENSMUST00000150434	ENSMUSG00000063663	Brwd3	11619	1.84864	2.3716	0.0038
ENSMUST00000020106	ENSMUSG00000019947	Arid5b	4494	5.279	7.23276	5e-05
ENSMUST00000106484	ENSMUSG00000003810	Mast2	5292	8.75483	6.83229	0.02255
ENSMUST00000020277	ENSMUSG00000020080	Hkdc1	3517	3.59898	2.67653	0.0011
ENSMUST00000173433	ENSMUSG00000035021	Baz1a	5788	0.621525	0.99217	0.0002
ENSMUST00000141266	ENSMUSG00000023051	Tarbp2	1033	1.87664	0.950079	0.04945
ENSMUST00000020270	ENSMUSG00000020076	Ddx50	2527	33.9581	42.9528	0.00035
ENSMUST00000049151	ENSMUSG00000033356	Pus7l	2840	1.7977	1.40867	0.0354
ENSMUST00000159974	ENSMUSG00000025188	Hps1	4189	0.531405	0.3112	0.0441
ENSMUST00000095214	ENSMUSG00000036810	Cnep1r1	1731	8.22033	11.227	0.00125
ENSMUST00000094340	ENSMUSG00000070527	Mkrn3	2547	0.625931	0.421059	0.02215
ENSMUST00000099223	ENSMUSG00000027534	Snx16	2512	5.4876	7.46883	0.031
ENSMUST00000105617	ENSMUSG00000064065	Ipcef1	6041	27.3029	31.4082	0.0462
ENSMUST00000127206	ENSMUSG00000026360	Rgs2	3021	31.5626	36.527	0.0331
ENSMUST00000035208	ENSMUSG00000032589	Bsn	15938	17.718	21.6292	0.00405
ENSMUST00000001547	ENSMUSG00000001506	Col1a1	5930	1.01829	0.80255	0.02385
ENSMUST00000048305	ENSMUSG00000041846	Smek1	4555	7.67382	10.2081	0.00285
ENSMUST00000105293	ENSMUSG00000019961	Tmpo	3206	5.68179	8.90046	0.0015
ENSMUST00000120004	ENSMUSG00000057093	C030039L03Rik	4612	4.57373	5.38282	0.04775
ENSMUST00000020301	ENSMUSG00000020101	4632428N05Rik	4846	4.9214	3.97175	0.0389
ENSMUST00000060899	ENSMUSG00000044968	Napepld	3724	1.50968	2.50463	0.0406
ENSMUST00000014370	ENSMUSG00000014226	Cacybp	2098	46.9559	55.5012	0.01215
ENSMUST00000024119	ENSMUSG00000023348	Trip6	2168	1.13777	0.839363	0.04835
ENSMUST00000048527	ENSMUSG00000042073	Abhd14b	1479	3.05419	2.0513	0.0153
ENSMUST00000135373	ENSMUSG00000039620	6430573F11Rik	2573	1.41358	0.837466	0.0405
ENSMUST00000067077	ENSMUSG00000054178	Gm9938	1756	9.1324	11.8974	0.00155
ENSMUST00000100089	ENSMUSG00000075334	Rprm	1460	31.0905	26.7492	0.04015
ENSMUST00000121285	ENSMUSG00000024002	Brd4	5922	3.00217	4.3492	0.0001
ENSMUST00000071949	ENSMUSG00000060708	Bloc1s4	1273	10.7194	12.687	0.04665
ENSMUST00000131676	ENSMUSG00000078898	Gm4723	1272	5.69592	7.1106	0.02245
ENSMUST00000056558	ENSMUSG00000050919	Zfp366	2763	0.312669	0.474241	0.02695
ENSMUST00000028238	ENSMUSG00000026878	Rab14	3081	59.7165	68.5567	0.04975
ENSMUST00000096313	ENSMUSG00000042473	Tbc1d8b	5094	1.92751	2.3137	0.0339
ENSMUST00000110168	ENSMUSG00000022361	Zhx1	5212	2.9408	4.71862	0.03365
ENSMUST00000042147	ENSMUSG00000033294	Noc4l	2075	7.45572	5.94503	0.00805
ENSMUST00000078369	ENSMUSG00000061615	Hist1h2ab	473	7.95023	12.5317	0.002
ENSMUST00000031215	ENSMUSG00000029279	Brdt	4745	1.51272	1.90301	0.02785
ENSMUST00000094761	ENSMUSG00000042608	Stk40	3492	4.39867	5.84284	0.00045
ENSMUST00000102977	ENSMUSG00000060639	Hist1h4i	727	82.223	105.731	0.00065
ENSMUST00000025408	ENSMUSG00000024527	Afg3l2	3085	28.4975	24.3503	0.0202
ENSMUST00000102972	ENSMUSG00000060981	Hist1h4h	473	559.593	652.241	0.01825
ENSMUST00000025406	ENSMUSG00000024528	Srfbp1	1463	8.98663	10.8259	0.0272
ENSMUST00000102979	ENSMUSG00000069305	Hist1h4n	430	330.609	407.973	0.0017
ENSMUST00000163968	ENSMUSG00000006019	Dhx34	3801	2.11339	1.49986	0.00365
ENSMUST00000190679	ENSMUSG00000033159	Cnppd1	2062	3.78771	2.21417	0.0184
ENSMUST00000067476	ENSMUSG00000054408	Spcs3	3466	36.3735	44.3625	0.00215
ENSMUST00000043305	ENSMUSG00000037622	Wdtc1	4191	8.80586	10.3593	0.0272
ENSMUST00000029053	ENSMUSG00000027540	Ptpn1	4213	7.74228	10.0119	0.00135
ENSMUST00000070368	ENSMUSG00000036432	Siah2	2511	5.36527	6.56549	0.01455
ENSMUST00000119344	ENSMUSG00000027805	Pfn2	1879	115.446	140.273	0.0419
ENSMUST00000026985	ENSMUSG00000025867	Cplx2	4928	243.172	207.48	0.01515
ENSMUST00000054555	ENSMUSG00000047003	Zfp41	3736	0.488811	0.0986127	0.0457
ENSMUST00000102801	ENSMUSG00000049336	Tenm2	9908	6.06814	7.47488	0.0483
ENSMUST00000111147	ENSMUSG00000027184	Caprin1	4069	39.4272	47.9331	0.02525
ENSMUST00000069837	ENSMUSG00000056427	Slit3	5228	5.36005	6.33726	0.02505
ENSMUST00000055559	ENSMUSG00000050786	Ccdc126	2351	5.31176	6.78568	0.0069
ENSMUST00000111095	ENSMUSG00000015812	Gnrh1	521	1.04784	2.20343	0.0153
ENSMUST00000068532	ENSMUSG00000055128	Cgrrf1	1315	12.9562	16.0042	0.01285
ENSMUST00000054956	ENSMUSG00000024776	Stambpl1	2024	6.61317	8.90767	0.0074
ENSMUST00000123325	ENSMUSG00000022237	Ankrd33b	7464	16.8493	22.4748	0.0004
ENSMUST00000038368	ENSMUSG00000042745	Id1	934	11.3609	14.814	0.00495
ENSMUST00000186694	ENSMUSG00000070939	Tgfbrap1	5385	6.00897	4.69726	0.02055
ENSMUST00000023934	ENSMUSG00000052305	Hbb-bs	778	95.2035	139.116	0.00015
ENSMUST00000064257	ENSMUSG00000052415	Tchh	5823	1.04412	0.776929	0.0055
ENSMUST00000170002	ENSMUSG00000021111	Papola	2605	3.62824	6.29075	0.01825
ENSMUST00000100527	ENSMUSG00000002524	Puf60	1912	52.4998	39.9093	0.0036
ENSMUST00000086041	ENSMUSG00000061028	Clasrp	2153	8.97258	6.55379	0.00025
ENSMUST00000146863	ENSMUSG00000038005	2700029M09Rik	531	8.76076	3.78355	0.0392
ENSMUST00000054730	ENSMUSG00000038212	Hiatl1	3354	7.75052	10.3711	0.0175
ENSMUST00000029875	ENSMUSG00000028221	Tmem55a	2339	19.6659	23.3399	0.01555
ENSMUST00000044019	ENSMUSG00000030089	Slc41a3	2412	1.91365	1.42736	0.01575
ENSMUST00000012259	ENSMUSG00000012114	Med15	3383	1.96943	1.04572	0.03125
ENSMUST00000026217	ENSMUSG00000025199	Chuk	3502	7.78966	9.71352	0.0176
ENSMUST00000034467	ENSMUSG00000031986	Sprtn	2116	4.78726	3.83656	0.0163
ENSMUST00000119746	ENSMUSG00000068284	Gm608	12708	3.74955	4.86821	0.0309
ENSMUST00000067853	ENSMUSG00000054675	Tmem119	2242	6.84258	8.23917	0.0216
ENSMUST00000114323	ENSMUSG00000059486	Kbtbd2	3816	22.4752	27.4232	0.00675
ENSMUST00000026670	ENSMUSG00000025582	Nptx1	5217	42.9663	49.8564	0.02155
ENSMUST00000026672	ENSMUSG00000025584	Pde8a	3802	3.24474	2.6324	0.01505
ENSMUST00000031032	ENSMUSG00000029147	Ppm1g	2307	24.1283	20.6858	0.0354
ENSMUST00000030030	ENSMUSG00000028345	Tex10	3102	9.14927	11.6944	0.007
ENSMUST00000160721	ENSMUSG00000051375	Pcdh1	5416	12.5716	15.7221	0.0167
ENSMUST00000107619	ENSMUSG00000003032	Klf4	3029	0.766983	1.02563	0.02765
ENSMUST00000026698	ENSMUSG00000025608	Podxl	5379	4.22593	3.44977	0.00875
ENSMUST00000104915	ENSMUSG00000078117	Gm16485	3983	4.62964	5.5275	0.02505
ENSMUST00000069005	ENSMUSG00000020589	Fam49a	4773	47.4584	55.9938	0.03635
ENSMUST00000069000	ENSMUSG00000032392	Parp16	2483	0.903947	0.615757	0.01355
ENSMUST00000147115	ENSMUSG00000031922	Cep57	2262	2.63118	1.68302	0.02755
ENSMUST00000071585	ENSMUSG00000027584	Oprl1	2999	13.9186	18.8715	0.0013
ENSMUST00000030320	ENSMUSG00000028582	Cc2d1b	3303	5.51775	4.23325	0.01415
ENSMUST00000030491	ENSMUSG00000028719	Cmpk1	3170	29.9915	34.439	0.0407
ENSMUST00000084418	ENSMUSG00000025147	Mob2	1456	15.8531	18.9607	0.0212
ENSMUST00000094695	ENSMUSG00000070730	Rmdn3	2249	25.5989	30.1517	0.02085
ENSMUST00000102626	ENSMUSG00000030854	Ptpn5	3134	14.334	11.1517	0.0443
ENSMUST00000097336	ENSMUSG00000073412	Lst1	415	10.4499	6.81604	0.01395
ENSMUST00000107273	ENSMUSG00000068876	Cgn	5016	0.750852	0.374442	0.0007
ENSMUST00000107271	ENSMUSG00000001773	Folh1	2516	0.372792	0.888525	0.0056
ENSMUST00000108955	ENSMUSG00000078867	Gm14418	1415	11.1262	13.6778	0.01465
ENSMUST00000179474	ENSMUSG00000044465	Fam160a2	10895	3.11389	4.52192	0.0378
ENSMUST00000034510	ENSMUSG00000032012	Pvrl1	5054	5.4042	6.48843	0.01485
ENSMUST00000034843	ENSMUSG00000032293	Ireb2	5808	15.8711	19.5802	0.0018
ENSMUST00000030811	ENSMUSG00000028967	Errfi1	3043	11.7875	13.8144	0.0286
ENSMUST00000040312	ENSMUSG00000032715	Trib3	2026	0.414663	0.170687	0.00245
ENSMUST00000037315	ENSMUSG00000039202	Abhd2	6877	29.5396	25.296	0.0174
ENSMUST00000035086	ENSMUSG00000032504	Pdcd6ip	5951	7.3206	8.62883	0.044
ENSMUST00000179077	ENSMUSG00000096768	Erdr1	895	7.01946	4.39688	0.01455
ENSMUST00000030145	ENSMUSG00000028436	Dcaf12	3442	12.3861	14.7577	0.01415
ENSMUST00000193932	ENSMUSG00000010064	Slc38a3	2463	17.934	13.9576	0.00605
ENSMUST00000061688	ENSMUSG00000036552	Ermard	2120	7.86491	5.91017	0.00095
ENSMUST00000199314	ENSMUSG00000040473	Cfap69	2189	1.30813	0.513192	0.02475
ENSMUST00000037796	ENSMUSG00000033021	Gmppa	1539	8.43334	6.44812	0.033
ENSMUST00000096554	ENSMUSG00000071847	Apcdd1	2799	5.84464	4.75224	0.0116
ENSMUST00000113575	ENSMUSG00000051703	Tmem198	2185	17.0473	20.6738	0.0299
ENSMUST00000096639	ENSMUSG00000070426	Rnf121	2249	12.6687	15.2659	0.03
ENSMUST00000020463	ENSMUSG00000020238	Ncln	3118	6.95559	5.42395	0.0107
ENSMUST00000036456	ENSMUSG00000021572	Cep72	3632	0.426005	0.289499	0.0281
ENSMUST00000036680	ENSMUSG00000039759	Thap3	1124	6.87676	5.56877	0.04885
ENSMUST00000101055	ENSMUSG00000021258	Ccnk	2627	1.75068	2.16542	0.0478
ENSMUST00000146088	ENSMUSG00000035944	Ttc38	3749	2.14472	1.65869	0.0113
ENSMUST00000113975	ENSMUSG00000089774	Slc5a3	10913	10.847	15.7962	5e-05
ENSMUST00000113977	ENSMUSG00000045098	Suv420h1	6002	2.56048	5.31505	0.01745
ENSMUST00000102494	ENSMUSG00000037958	Ccdc55	3114	6.12244	4.89247	0.0062
ENSMUST00000082392	ENSMUSG00000064341	mt-Nd1	957	1682.86	1321.24	0.00025
ENSMUST00000102493	ENSMUSG00000020836	Coro6	2804	1.1994	0.82811	0.0214
ENSMUST00000082396	ENSMUSG00000064345	mt-Nd2	1038	708.378	563.843	0.00035
ENSMUST00000151952	ENSMUSG00000026110	Mgat4a	7251	9.24502	11.4923	0.0485
ENSMUST00000059452	ENSMUSG00000050600	Zfp831	9807	3.92878	4.6905	0.0123
ENSMUST00000048147	ENSMUSG00000036977	Anapc10	2802	3.02046	3.98525	0.0023
ENSMUST00000047168	ENSMUSG00000041119	Pde9a	2065	6.16521	4.49453	0.0058
ENSMUST00000179854	ENSMUSG00000026269	Rnpepl1	4345	0.956819	0.556505	0.0395
ENSMUST00000179505	ENSMUSG00000095041	PISD	2373	49.0309	39.8585	0.04155
ENSMUST00000177205	ENSMUSG00000064264	Zfp428	1159	3.87239	5.87523	0.02625
ENSMUST00000183432	ENSMUSG00000028521	Slc35d1	4414	0.503701	0.276448	0.0185
ENSMUST00000051929	ENSMUSG00000026739	Bmi1	2747	5.86773	9.45951	0.0147
ENSMUST00000101432	ENSMUSG00000021010	Npas3	5879	3.10569	2.63361	0.0376
ENSMUST00000046433	ENSMUSG00000036537	Rnf113a1	1223	5.40903	4.3559	0.04365
ENSMUST00000033783	ENSMUSG00000031409	Tceal6	1114	60.1399	49.0054	0.00335
ENSMUST00000060955	ENSMUSG00000027346	Gpcpd1	3686	27.1717	22.0784	0.04555
ENSMUST00000059672	ENSMUSG00000025017	Pik3ap1	2615	0.662705	0.447076	0.02125
ENSMUST00000036350	ENSMUSG00000039496	Cdnf	3013	0.680817	0.495254	0.04415
ENSMUST00000044551	ENSMUSG00000009828	Ick	6560	2.19509	2.66317	0.0346
ENSMUST00000049206	ENSMUSG00000021895	Arhgef3	3585	22.4238	29.3387	5e-05
ENSMUST00000000188	ENSMUSG00000000184	Ccnd2	6330	7.39587	9.47113	0.0006
ENSMUST00000138091	ENSMUSG00000027893	Ahcyl1	3291	3.57665	10.1832	0.03755
ENSMUST00000034267	ENSMUSG00000031808	Slc27a1	2795	19.7828	15.9045	0.00155
ENSMUST00000109872	ENSMUSG00000044364	Tmem74b	1399	1.14417	0.661552	0.021
ENSMUST00000114415	ENSMUSG00000038331	Satb2	5805	6.17868	7.76701	0.0203
ENSMUST00000154122	ENSMUSG00000050323	Ndufaf6	528	0.798094	2.88863	0.0454
ENSMUST00000057093	ENSMUSG00000044149	Nkrf	3268	16.1857	18.8386	0.03115
ENSMUST00000109586	ENSMUSG00000049800	Sertad2	5515	4.59657	3.68406	0.02565
ENSMUST00000041208	ENSMUSG00000036678	Aaas	1816	4.65224	3.73676	0.02125
ENSMUST00000114976	ENSMUSG00000024188	Luc7l	4934	28.0404	33.2844	0.01515
ENSMUST00000047321	ENSMUSG00000055116	Arntl	2904	13.2587	17.866	5e-05
ENSMUST00000206832	ENSMUSG00000040725	Hnrnpul1	3784	19.265	16.3129	0.03485
ENSMUST00000170489	ENSMUSG00000032097	Ddx6	6065	37.8723	44.0308	0.01985
ENSMUST00000002176	ENSMUSG00000002107	Celf2	7718	10.1932	14.2986	0.02135
ENSMUST00000053116	ENSMUSG00000051022	Hs3st1	1684	10.1935	7.76431	0.0011
ENSMUST00000105283	ENSMUSG00000019966	Kitl	5645	12.9053	16.2461	0.0007
ENSMUST00000173524	ENSMUSG00000071454	Dtnb	1629	11.7238	18.4062	0.02035
ENSMUST00000099691	ENSMUSG00000037012	Hk1	4278	42.8777	35.6892	0.03065
ENSMUST00000013759	ENSMUSG00000008200	Fnbp4	4691	8.60335	6.07909	5e-05
ENSMUST00000202361	ENSMUSG00000029657	Hsph1	3802	39.8114	54.5424	0.0004
ENSMUST00000117269	ENSMUSG00000021277	Traf3	6972	1.02344	2.10408	0.01445
ENSMUST00000169627	ENSMUSG00000037003	Tns2	4707	1.16556	0.818107	0.02105
ENSMUST00000131468	ENSMUSG00000040938	Slc16a11	734	2.40423	1.20042	0.04235
ENSMUST00000150779	ENSMUSG00000054256	Msi1	3133	2.35065	1.71031	0.00575
ENSMUST00000136145	ENSMUSG00000059540	Tcea2	1118	4.80636	2.87305	0.02945
ENSMUST00000098272	ENSMUSG00000074001	Klhl40	2455	3.37665	2.70115	0.0194
ENSMUST00000053733	ENSMUSG00000029245	Epha5	7328	8.00588	10.2227	0.03045
ENSMUST00000006293	ENSMUSG00000006134	Crkl	3863	11.9793	14.073	0.0219
ENSMUST00000056749	ENSMUSG00000042997	Nhlrc3	5047	2.47155	1.83673	0.03735
ENSMUST00000092665	ENSMUSG00000010461	Eya4	4091	0.937876	1.21604	0.0406
ENSMUST00000028222	ENSMUSG00000026864	Hspa5	3672	13.9101	23.7744	0.0034
ENSMUST00000003717	ENSMUSG00000042476	Abcb4	4079	2.25687	1.73216	0.0097
ENSMUST00000021135	ENSMUSG00000020783	1200014J11Rik	12106	2.49034	2.9616	0.02115
ENSMUST00000177068	ENSMUSG00000046691	Chtf8	2931	26.9322	31.5427	0.0268
ENSMUST00000064404	ENSMUSG00000031068	Glrx3	1651	53.4337	63.7424	0.00965
ENSMUST00000035010	ENSMUSG00000032437	Stt3b	4195	29.33	33.9523	0.0265
ENSMUST00000025965	ENSMUSG00000025001	Hells	5868	1.17352	0.952357	0.0444
ENSMUST00000102965	ENSMUSG00000069266	Hist1h4b	397	89.2587	127.671	5e-05
ENSMUST00000102967	ENSMUSG00000060678	Hist1h4c	395	666.323	765.816	0.0362
ENSMUST00000003620	ENSMUSG00000003526	Prodh	2385	7.30176	9.39368	0.0469
ENSMUST00000067443	ENSMUSG00000054404	Slfn5	4080	1.05854	1.40866	0.04285
ENSMUST00000105420	ENSMUSG00000020178	Adora2a	2534	19.7457	16.8043	0.0272
ENSMUST00000025092	ENSMUSG00000024245	Tmem178	1696	43.541	50.7273	0.02655
ENSMUST00000029060	ENSMUSG00000027546	Atp9a	3529	31.9885	17.7788	0.00905
ENSMUST00000038422	ENSMUSG00000034168	Irf2bpl	4112	12.591	15.5945	0.00175
ENSMUST00000098300	ENSMUSG00000035704	Alg8	2039	2.06553	1.59813	0.046
ENSMUST00000026990	ENSMUSG00000025872	Thoc3	2335	16.2802	13.9619	0.039
ENSMUST00000043937	ENSMUSG00000041084	Ostc	1067	40.0448	48.6961	0.00825
ENSMUST00000022787	ENSMUSG00000022180	Slc7a8	4033	7.87429	6.47032	0.00815
ENSMUST00000029084	ENSMUSG00000027568	Ntsr1	3917	1.84941	1.49961	0.0465
ENSMUST00000003445	ENSMUSG00000003355	Fkbp11	731	3.00483	2.10682	0.04245
ENSMUST00000026062	ENSMUSG00000025076	Casp7	2350	1.59327	1.16027	0.0126
ENSMUST00000204308	ENSMUSG00000042810	Krba1	5055	3.38613	2.5829	0.04515
ENSMUST00000162023	ENSMUSG00000020079	Supv3l1	2519	1.69965	0.888116	0.0198
ENSMUST00000051293	ENSMUSG00000044197	Gpr146	4157	4.47287	3.32507	0.0153
ENSMUST00000043208	ENSMUSG00000034460	Six4	6402	0.466959	0.704275	0.00115
ENSMUST00000043204	ENSMUSG00000035329	Fbxo33	3688	20.4554	26.2842	0.00055
ENSMUST00000042889	ENSMUSG00000034269	Setd5	6755	4.88982	3.14918	0.0085
ENSMUST00000177921	ENSMUSG00000096808	AC132444.6	1500	1.95478	1.46109	0.0489
ENSMUST00000031331	ENSMUSG00000029385	Ccng2	2810	18.1367	22.5746	0.02995
ENSMUST00000031445	ENSMUSG00000029482	Aacs	3239	12.1027	13.9896	0.0422
ENSMUST00000064240	ENSMUSG00000020659	Cbll1	3530	0.437589	1.13539	0.00825
ENSMUST00000169036	ENSMUSG00000041180	Hectd2	3842	2.27398	3.17983	0.01705
ENSMUST00000168529	ENSMUSG00000032872	Cyb5r4	2644	13.3552	16.4492	0.00705
ENSMUST00000113595	ENSMUSG00000032217	Rnf111	4735	3.65027	5.50785	0.0388
ENSMUST00000086074	ENSMUSG00000040265	Dnm3	7523	15.0118	17.924	0.0337
ENSMUST00000030792	ENSMUSG00000028950	Tas1r1	2863	0.711421	0.520354	0.04065
ENSMUST00000094569	ENSMUSG00000026442	Nfasc	9739	11.8245	13.6328	0.0492
ENSMUST00000019075	ENSMUSG00000018931	Natd1	4179	2.23679	1.85426	0.04105
ENSMUST00000063980	ENSMUSG00000063488	Zkscan7	2228	1.89797	1.44614	0.0352
ENSMUST00000118771	ENSMUSG00000061559	Wdr61	3372	9.26017	11.895	0.02665
ENSMUST00000031841	ENSMUSG00000029817	Tra2a	1799	20.7349	34.3673	5e-05
ENSMUST00000080898	ENSMUSG00000063953	Amd2	3201	4.48623	5.44638	0.0175
ENSMUST00000067532	ENSMUSG00000024672	Ms4a7	1334	0.147487	0.408068	0.03435
ENSMUST00000000924	ENSMUSG00000000901	Mmp11	2288	0.837131	0.554759	0.01795
ENSMUST00000026662	ENSMUSG00000025577	Cbx2	3807	0.688069	0.520874	0.04375
ENSMUST00000034074	ENSMUSG00000031652	N4bp1	6469	12.0271	14.2642	0.01275
ENSMUST00000115206	ENSMUSG00000058440	Nrf1	1879	1.34307	2.29028	0.0238
ENSMUST00000030556	ENSMUSG00000028771	Ptpn12	3280	6.52438	8.64058	0.0002
ENSMUST00000019677	ENSMUSG00000028708	Mknk1	2543	6.37667	4.74605	0.00235
ENSMUST00000102703	ENSMUSG00000037001	Zfp39	3890	4.47453	3.71755	0.0214
ENSMUST00000163401	ENSMUSG00000037674	Rfx7	7880	3.56669	4.75449	0.0006
ENSMUST00000069870	ENSMUSG00000017418	Arl5b	6981	5.88743	7.95904	0.0002
ENSMUST00000112960	ENSMUSG00000026890	Lhx6	3345	1.37108	0.812215	0.04335
ENSMUST00000188553	ENSMUSG00000021843	Ktn1	3918	11.3586	5.19691	0.0002
ENSMUST00000119557	ENSMUSG00000033377	Palmd	3305	0.355289	0.699933	0.03295
ENSMUST00000034215	ENSMUSG00000031765	Mt1	540	429.986	371.054	0.02505
ENSMUST00000094894	ENSMUSG00000070867	Trabd2b	6617	0.648412	0.830486	0.0204
ENSMUST00000027131	ENSMUSG00000025986	Slc39a10	5498	66.3024	77.8103	0.01475
ENSMUST00000094962	ENSMUSG00000029004	Kmt2e	7252	2.81051	5.48901	0.01775
ENSMUST00000030313	ENSMUSG00000028578	Caap1	2107	4.95043	6.38982	0.0066
ENSMUST00000146472	ENSMUSG00000003534	Ddr1	1032	2.63971	1.20127	0.0342
ENSMUST00000102633	ENSMUSG00000048997	Atxn7l2	3044	0.778665	0.479126	0.04685
ENSMUST00000064454	ENSMUSG00000041638	Gcn1l1	8555	10.906	9.4759	0.0385
ENSMUST00000197316	ENSMUSG00000041718	Alg13	3839	0.58148	1.10009	0.017
ENSMUST00000154853	ENSMUSG00000035642	Aamdc	883	10.9386	15.3753	0.00815
ENSMUST00000058814	ENSMUSG00000043463	Rab9b	3980	11.5121	13.7135	0.01305
ENSMUST00000045847	ENSMUSG00000040857	Erf	3505	11.7848	9.91089	0.0162
ENSMUST00000188175	ENSMUSG00000079330	Lemd1	5271	1.89636	1.35969	0.00275
ENSMUST00000178730	ENSMUSG00000059456	Ptk2b	3863	5.66662	14.0012	0.0081
ENSMUST00000023074	ENSMUSG00000022439	Parvg	2619	2.80593	2.29499	0.03965
ENSMUST00000073554	ENSMUSG00000062329	Cytl1	974	1.12941	1.76793	0.01895
ENSMUST00000133193	ENSMUSG00000041607	Mbp	1922	389.632	324.988	0.02165
ENSMUST00000040498	ENSMUSG00000036492	Rnf39	1579	1.80579	2.38893	0.0296
ENSMUST00000027290	ENSMUSG00000026116	Tmem131	6546	5.29425	7.15137	0.0031
ENSMUST00000027559	ENSMUSG00000026321	Tnfrsf11a	5027	1.79323	1.43742	0.0172
ENSMUST00000030773	ENSMUSG00000028933	Xrcc2	3247	2.41144	3.10373	0.0075
ENSMUST00000060050	ENSMUSG00000050105	Grrp1	1226	0.90008	1.4768	0.0101
ENSMUST00000020846	ENSMUSG00000020538	Srebf1	4299	5.86559	4.28752	0.03545
ENSMUST00000046975	ENSMUSG00000033623	Pcgf3	7708	7.2144	8.70455	0.00695
ENSMUST00000106242	ENSMUSG00000030786	Itgam	4649	3.50408	2.60939	0.00875
ENSMUST00000040787	ENSMUSG00000039988	Ankrd13c	3903	18.5755	21.7396	0.04185
ENSMUST00000051390	ENSMUSG00000049600	Zbtb45	2139	3.50962	2.54298	0.0158
ENSMUST00000102555	ENSMUSG00000027166	Dnajc24	1197	5.2749	6.79962	0.03415
ENSMUST00000074077	ENSMUSG00000021835	Bmp4	2064	0.36174	0.882708	0.00175
ENSMUST00000021413	ENSMUSG00000021025	Nfkbia	1577	9.11573	11.4417	0.0058
ENSMUST00000106027	ENSMUSG00000038611	Phrf1	5248	4.96025	6.25313	0.01905
ENSMUST00000159939	ENSMUSG00000016624	Phf21b	3639	1.25006	1.85183	0.0189
ENSMUST00000199238	ENSMUSG00000028184	Adgrl2	4670	3.047	5.23725	0.04485
ENSMUST00000020896	ENSMUSG00000020577	Tspan13	1932	88.8992	102.186	0.034
ENSMUST00000061273	ENSMUSG00000044548	Dact1	3650	0.789879	1.05107	0.0321
ENSMUST00000129400	ENSMUSG00000007646	Rad51c	938	0.0544513	0.808436	0.03075
ENSMUST00000180239	ENSMUSG00000094595	Fsbp	4358	0.730487	0.434859	0.0059
ENSMUST00000023477	ENSMUSG00000022789	Dnm1l	4017	25.7972	34.2929	0.01725
ENSMUST00000107866	ENSMUSG00000078716	Tmem8b	4998	2.98421	1.78094	0.02925
ENSMUST00000051934	ENSMUSG00000044715	Gskip	2776	10.9946	13.0651	0.01935
ENSMUST00000051937	ENSMUSG00000049907	Rasl11b	1812	20.4019	15.7908	0.00065
ENSMUST00000041364	ENSMUSG00000036693	Nop14	2702	7.8918	6.60965	0.0246
ENSMUST00000041367	ENSMUSG00000037103	Dcaf15	2320	5.11627	4.24469	0.03215
ENSMUST00000109468	ENSMUSG00000070544	Top1	3856	24.2485	29.7745	0.00335
ENSMUST00000066296	ENSMUSG00000035614	Fam179b	6434	21.1026	24.8197	0.01375
ENSMUST00000099112	ENSMUSG00000025348	Itga7	4013	3.08768	2.53781	0.0231
ENSMUST00000134404	ENSMUSG00000029478	Ncor2	3589	0.522324	1.06999	0.0419
ENSMUST00000169938	ENSMUSG00000021111	Papola	4356	8.18142	11.1351	0.0312
ENSMUST00000001147	ENSMUSG00000001119	Col6a1	4100	12.7505	9.45774	0.00015
ENSMUST00000032931	ENSMUSG00000030691	Fchsd2	4405	4.15144	6.95299	0.0005
ENSMUST00000087723	ENSMUSG00000038146	Notch3	8044	1.0727	0.84213	0.027
ENSMUST00000119706	ENSMUSG00000005225	Plekha8	6739	4.15089	4.95751	0.0482
ENSMUST00000132612	ENSMUSG00000006576	Slc4a3	6227	6.34579	4.66007	0.0422
ENSMUST00000206221	ENSMUSG00000030423	Pop4	892	2.92574	1.28732	0.0291
ENSMUST00000145353	ENSMUSG00000020362	Cnot6	5736	10.6492	12.6101	0.0249
ENSMUST00000166678	ENSMUSG00000092035	Peg10	6664	0.0519264	4.42113	0.0004
ENSMUST00000101558	ENSMUSG00000040003	Magi2	6530	14.2679	17.6026	0.0268
ENSMUST00000087629	ENSMUSG00000029096	Htra3	2750	0.565055	0.36264	0.0278
ENSMUST00000047356	ENSMUSG00000038539	Atf5	1756	3.92076	2.29751	0.0313
ENSMUST00000099207	ENSMUSG00000074682	Zcchc3	3073	3.61898	2.90667	0.0148
ENSMUST00000039373	ENSMUSG00000035898	Uba6	6590	5.47863	7.6418	0.00435
ENSMUST00000105384	ENSMUSG00000032763	Ilvbl	2325	8.78954	7.37617	0.02805
ENSMUST00000056978	ENSMUSG00000021375	Kif13a	6866	5.37059	4.54414	0.0254
ENSMUST00000035822	ENSMUSG00000033033	Calhm2	2458	2.48484	3.7118	0.02645
ENSMUST00000099683	ENSMUSG00000075014	Gm10800	665	20.8745	15.3198	0.0013
ENSMUST00000053306	ENSMUSG00000049112	Oxtr	4704	1.57988	2.15704	0.00665
ENSMUST00000039480	ENSMUSG00000035671	Zswim4	4348	3.74051	4.68926	0.0042
ENSMUST00000028100	ENSMUSG00000024240	Epc1	3965	4.2787	5.63056	0.03985
ENSMUST00000147875	ENSMUSG00000072640	Lyrm9	8035	8.91835	7.29386	0.0034
ENSMUST00000098799	ENSMUSG00000074364	Ehd2	5100	0.888968	0.595442	0.0006
ENSMUST00000049308	ENSMUSG00000042644	Itpr3	8990	0.548213	0.321288	5e-05
ENSMUST00000170580	ENSMUSG00000051726	Kcnf1	4789	25.1252	29.1352	0.0246
ENSMUST00000173163	ENSMUSG00000042632	Pla2g6	3018	0.863853	1.99455	0.0117
ENSMUST00000052725	ENSMUSG00000032018	Sc5d	2249	20.0871	23.9114	0.0178
ENSMUST00000159551	ENSMUSG00000060475	Wtap	2060	2.42628	5.07466	0.03235
ENSMUST00000133213	ENSMUSG00000034275	Igsf9b	4237	6.1533	8.00493	0.0008
ENSMUST00000025319	ENSMUSG00000024446	Rpp21	729	12.6668	9.65139	0.03545
ENSMUST00000005862	ENSMUSG00000005718	Tfap4	2113	1.56327	1.18635	0.0367
ENSMUST00000110320	ENSMUSG00000042851	Zc3h6	4916	8.03408	5.98398	0.00015
ENSMUST00000178271	ENSMUSG00000094870	Zfp131	2965	9.40263	12.6304	0.0177
ENSMUST00000028676	ENSMUSG00000027242	Wdr76	2789	0.569964	0.960769	0.03815
ENSMUST00000071562	ENSMUSG00000038268	Ovca2	2670	11.1323	8.07173	0.0022
ENSMUST00000100171	ENSMUSG00000026864	Hspa5	2613	114.827	194.311	5e-05
ENSMUST00000159739	ENSMUSG00000038550	Ciart	1939	1.23431	0.683401	0.04685
ENSMUST00000029071	ENSMUSG00000027555	Car13	2299	0.864253	1.15299	0.043
ENSMUST00000110433	ENSMUSG00000053216	Btn2a2	2370	0.319026	0.517523	0.0424
ENSMUST00000181850	ENSMUSG00000097061	9330151L19Rik	2546	8.41019	6.66769	0.0113
ENSMUST00000056028	ENSMUSG00000042978	Sbk1	4109	11.6851	15.2556	0.0001
ENSMUST00000097826	ENSMUSG00000025915	Sgk3	2728	0.564822	1.81081	0.0027
ENSMUST00000097820	ENSMUSG00000040964	Arhgef10l	4382	7.01003	5.48932	0.0081
ENSMUST00000148330	ENSMUSG00000026034	Clk1	1705	8.80664	15.9648	0.01965
ENSMUST00000185343	ENSMUSG00000021843	Ktn1	3846	4.80116	8.69645	0.0012
ENSMUST00000042452	ENSMUSG00000032869	Psmf1	3809	4.68712	3.69839	0.02235
ENSMUST00000022337	ENSMUSG00000021803	Cdhr1	4303	2.37999	1.87147	0.0085
ENSMUST00000061878	ENSMUSG00000045259	Klhdc9	1558	6.56735	4.34017	0.0214
ENSMUST00000194542	ENSMUSG00000003308	Keap1	3151	5.86709	3.48878	0.00495
ENSMUST00000111050	ENSMUSG00000048482	Bdnf	3965	2.01795	3.66946	0.0183
ENSMUST00000008579	ENSMUSG00000008435	Rdh13	3034	7.8555	9.27795	0.04705
ENSMUST00000178056	ENSMUSG00000080316	Spaca6	4074	2.83089	2.17188	0.02205
ENSMUST00000077925	ENSMUSG00000020099	Unc5b	5852	3.01138	2.42446	0.00735
ENSMUST00000068261	ENSMUSG00000024403	Atp6v1g2	1528	95.2445	82.6508	0.03965
ENSMUST00000163764	ENSMUSG00000025764	Jade1	5584	5.86655	7.30052	0.04145
ENSMUST00000031490	ENSMUSG00000029512	Ulk1	5213	6.10745	7.42034	0.00895
ENSMUST00000029891	ENSMUSG00000028232	Tmem68	2690	20.7575	24.4175	0.0221
ENSMUST00000022246	ENSMUSG00000021732	Fgf10	4114	1.06384	1.36947	0.0162
ENSMUST00000022242	ENSMUSG00000021728	Emb	2253	14.9276	18.0634	0.01035
ENSMUST00000029303	ENSMUSG00000063273	Naa15	6090	10.1514	12.7036	0.0041
ENSMUST00000119943	ENSMUSG00000048279	Sacs	14991	20.9844	23.9662	0.04705
ENSMUST00000108153	ENSMUSG00000028274	Rngtt	4157	7.69301	9.97612	0.0028
ENSMUST00000043108	ENSMUSG00000051278	Zgrf1	7046	0.8949	0.520302	0.0046
ENSMUST00000178293	ENSMUSG00000046269	Usp27x	4273	1.18795	2.11033	0.00115
ENSMUST00000031545	ENSMUSG00000029563	Foxp2	5647	3.26736	4.16628	0.03505
ENSMUST00000031017	ENSMUSG00000029135	Fosl2	6537	4.80371	7.72158	5e-05
ENSMUST00000034041	ENSMUSG00000031627	Irf2	2484	5.00272	5.97889	0.03535
ENSMUST00000030547	ENSMUSG00000028763	Hspg2	14187	0.447347	0.351159	0.0485
ENSMUST00000030010	ENSMUSG00000015243	Abca1	10262	8.87759	7.31655	0.00405
ENSMUST00000023268	ENSMUSG00000022602	Arc	3055	26.8111	42.4424	5e-05
ENSMUST00000070165	ENSMUSG00000063550	Nup98	4051	8.81432	10.2053	0.04105
ENSMUST00000033941	ENSMUSG00000031538	Plat	2531	12.5244	17.9673	5e-05
ENSMUST00000023262	ENSMUSG00000022591	Gm9747	2822	4.53581	5.96046	0.027
ENSMUST00000015358	ENSMUSG00000015214	Mtmr1	4634	13.6964	15.9736	0.0315
ENSMUST00000108370	ENSMUSG00000027550	Lrrcc1	3359	3.63219	1.9707	0.0318
ENSMUST00000026303	ENSMUSG00000025269	Apex2	1884	0.536986	1.33572	0.04715
ENSMUST00000055221	ENSMUSG00000050138	Kcnk12	1936	4.05398	5.33561	0.0028
ENSMUST00000102605	ENSMUSG00000020893	Per1	4537	0.149651	0.731032	0.0152
ENSMUST00000060427	ENSMUSG00000053560	Ier2	1522	4.57739	2.86829	0.0001
ENSMUST00000055226	ENSMUSG00000026193	Fn1	8315	1.70404	1.13832	0.0369
ENSMUST00000146409	ENSMUSG00000034320	Slc26a2	7814	2.04755	1.65192	0.01845
ENSMUST00000108975	ENSMUSG00000078875	Gm14419	683	9.7727	13.525	0.019
ENSMUST00000026547	ENSMUSG00000025474	Tubgcp2	3085	11.6254	9.74921	0.0159
ENSMUST00000026225	ENSMUSG00000025207	Sema4g	4548	1.48982	0.849496	0.0041
ENSMUST00000060609	ENSMUSG00000058246	Gm10037	319	1.37769	0	5e-05
ENSMUST00000051239	ENSMUSG00000043461	Sptssb	1795	1.27905	1.93417	0.0067
ENSMUST00000082134	ENSMUSG00000037563	Rps16	650	299.951	259.34	0.03675
ENSMUST00000162592	ENSMUSG00000062040	Zfp27	3845	2.90309	3.85295	0.0257
ENSMUST00000010250	ENSMUSG00000024650	Slc22a6	4026	1.78859	1.34089	0.0042
ENSMUST00000027125	ENSMUSG00000025981	Coq10b	1733	22.1976	26.5393	0.01515
ENSMUST00000034227	ENSMUSG00000031775	Pllp	1889	19.5271	13.9833	5e-05
ENSMUST00000096573	ENSMUSG00000024352	Spata24	709	4.56952	3.03618	0.02225
ENSMUST00000074043	ENSMUSG00000037465	Klf10	3045	12.725	17.5111	5e-05
ENSMUST00000020408	ENSMUSG00000020184	Mdm2	3086	10.1633	12.7675	0.0048
ENSMUST00000141839	ENSMUSG00000020328	Nudcd2	577	7.79477	3.90974	0.04465
ENSMUST00000065967	ENSMUSG00000055214	Pld5	3557	1.3323	1.80065	0.04045
ENSMUST00000021938	ENSMUSG00000021482	Aaed1	972	7.2331	8.93359	0.0364
ENSMUST00000051839	ENSMUSG00000046240	Hepacam	3327	9.12811	7.65676	0.0185
ENSMUST00000021423	ENSMUSG00000072919	Noxred1	1101	0.276338	0.808724	0.0021
ENSMUST00000059383	ENSMUSG00000050035	Fhl4	2670	0.658299	0.38723	0.0032
ENSMUST00000170846	ENSMUSG00000034858	Fam214a	4355	7.54184	4.81941	0.00025
ENSMUST00000014957	ENSMUSG00000014813	Stc1	3743	0.921202	1.16824	0.04055
ENSMUST00000190373	ENSMUSG00000032258	Lca5	1728	0.465877	1.21353	0.00865
ENSMUST00000165824	ENSMUSG00000026227	2810459M11Rik	3331	4.05547	3.13302	0.00435
ENSMUST00000169838	ENSMUSG00000023800	Tiam2	6143	2.76274	1.29134	0.04675
ENSMUST00000073128	ENSMUSG00000013646	Sh3bp5l	2977	10.0242	12.8203	0.0269
ENSMUST00000167264	ENSMUSG00000031585	Gtf2e2	1566	4.12444	8.21114	0.00295
ENSMUST00000141942	ENSMUSG00000079109	Pms2	6157	0.734988	0.369405	0.01305
ENSMUST00000113355	ENSMUSG00000030064	Frmd4b	4913	1.5072	0.949205	0.01475
ENSMUST00000049169	ENSMUSG00000042557	Sin3a	4845	2.90301	5.43099	0.04675
ENSMUST00000021333	ENSMUSG00000020950	Foxg1	2941	8.69776	11.347	0.01
ENSMUST00000021685	ENSMUSG00000021260	Hhipl1	2605	1.63035	1.22489	0.01915
ENSMUST00000059498	ENSMUSG00000043019	Edem3	6327	14.3853	17.8882	0.0023
ENSMUST00000021682	ENSMUSG00000021257	Angel1	3850	1.85328	1.3463	0.00255
ENSMUST00000103232	ENSMUSG00000044496	2510039O18Rik	2731	8.07915	9.5243	0.03195
ENSMUST00000061483	ENSMUSG00000049086	Bmyc	983	20.8408	17.1573	0.019
ENSMUST00000172753	ENSMUSG00000090877	Hspa1b	2803	3.97267	5.44805	0.0004
ENSMUST00000058011	ENSMUSG00000002870	Mcm2	3371	1.53274	1.15324	0.0131
ENSMUST00000062118	ENSMUSG00000043257	Pigv	3979	1.49072	1.16828	0.02365
ENSMUST00000028829	ENSMUSG00000027351	Spred1	6016	51.5495	73.0476	5e-05
ENSMUST00000121520	ENSMUSG00000031310	Zmym3	5564	15.5043	13.1037	0.04
ENSMUST00000021203	ENSMUSG00000020843	Timm22	2817	11.4768	14.4595	0.00295
ENSMUST00000014421	ENSMUSG00000055204	Ankrd17	10458	3.23397	4.6827	0.0268
ENSMUST00000033634	ENSMUSG00000031278	Acsl4	5280	16.8051	21.5434	0.04195
ENSMUST00000028683	ENSMUSG00000027248	Pdia3	2770	39.1095	50.8954	5e-05
ENSMUST00000039173	ENSMUSG00000026319	2310035C23Rik	4328	7.33863	5.39791	0.04715
ENSMUST00000170667	ENSMUSG00000035378	Shq1	1990	1.90175	2.62226	0.0334
ENSMUST00000091798	ENSMUSG00000034006	Pqlc1	1989	1.65984	2.61521	0.0303
ENSMUST00000058633	ENSMUSG00000050875	A730017C20Rik	1862	7.96278	6.35434	0.0386
ENSMUST00000047906	ENSMUSG00000034640	Tiparp	4191	6.59015	8.08536	0.00685
ENSMUST00000066049	ENSMUSG00000049420	Tmem200a	4115	4.13331	6.03887	5e-05
ENSMUST00000005255	ENSMUSG00000005124	Wisp1	5097	0.827218	1.38331	5e-05
ENSMUST00000020339	ENSMUSG00000020130	Tbc1d15	3773	7.45335	8.62785	0.04865
ENSMUST00000206362	ENSMUSG00000074283	Zfp109	2932	1.91679	2.59908	0.0257
ENSMUST00000028119	ENSMUSG00000026779	Mastl	5590	0.543215	0.412033	0.03915
ENSMUST00000028117	ENSMUSG00000026775	Yme1l1	4707	36.5228	41.9263	0.0378
ENSMUST00000196820	ENSMUSG00000029298	Gbp9	5043	0.403644	0.179636	0.0177
ENSMUST00000028114	ENSMUSG00000026773	Pfkfb3	4712	3.46054	5.21523	0.01205
ENSMUST00000075249	ENSMUSG00000052609	Plekhg3	4955	1.79248	1.47191	0.0354
ENSMUST00000110089	ENSMUSG00000027274	Mkks	3178	9.68407	12.5224	0.00705
ENSMUST00000071977	ENSMUSG00000060572	Mfap2	1073	0.998848	0.521377	0.0086
ENSMUST00000110087	ENSMUSG00000037946	Fgd3	4698	1.52703	1.22498	0.0457
ENSMUST00000071973	ENSMUSG00000057069	Ero1lb	4237	6.40574	7.93524	0.01885
ENSMUST00000098250	ENSMUSG00000030691	Fchsd2	4316	5.67636	3.30752	0.009
ENSMUST00000035672	ENSMUSG00000039457	Ppl	6277	0.411558	0.294416	0.0172
ENSMUST00000099090	ENSMUSG00000027806	Tsc22d2	9799	5.17248	6.58272	0.00225
ENSMUST00000105393	ENSMUSG00000000732	Icosl	2756	1.34095	0.928268	0.00455
ENSMUST00000002152	ENSMUSG00000002083	Bbc3	1814	1.8396	1.30906	0.0213
ENSMUST00000005671	ENSMUSG00000005533	Igf1r	4489	9.58859	11.1622	0.03545
ENSMUST00000086833	ENSMUSG00000029304	Spp1	1411	2.80265	0.115759	0.02055
ENSMUST00000168871	ENSMUSG00000045034	Ankrd34b	3397	1.15705	0.572366	0.03575
ENSMUST00000021119	ENSMUSG00000020774	Aspa	1530	13.9562	11.3837	0.0244
ENSMUST00000182491	ENSMUSG00000034009	Rxfp1	4983	2.24505	1.64362	0.02355
ENSMUST00000001825	ENSMUSG00000001774	Chordc1	2205	31.1992	46.5842	5e-05
ENSMUST00000023050	ENSMUSG00000022414	Tab1	2931	9.19751	7.75034	0.02545
ENSMUST00000080164	ENSMUSG00000029227	Fip1l1	4673	4.62727	7.53689	0.0246
ENSMUST00000184862	ENSMUSG00000039069	Mtg2	1730	2.33289	1.52956	0.0461
ENSMUST00000025944	ENSMUSG00000024986	Hhex	1802	0.594025	0.306727	0.0316
ENSMUST00000102945	ENSMUSG00000069132	Nxph2	2579	1.52353	2.03577	0.01015
ENSMUST00000042194	ENSMUSG00000038260	Trpm4	4245	2.11264	1.66646	0.01085
ENSMUST00000002737	ENSMUSG00000002661	Alkbh7	917	18.9477	14.3745	0.0015
ENSMUST00000002735	ENSMUSG00000002660	Clpp	1207	32.4131	27.6392	0.0328
ENSMUST00000055922	ENSMUSG00000048706	Lurap1l	3066	5.74307	6.98591	0.013
ENSMUST00000025230	ENSMUSG00000024371	C2	2641	1.75012	1.26029	0.03975
ENSMUST00000078800	ENSMUSG00000023994	Nfya	3653	1.04569	2.01138	0.00965
ENSMUST00000025234	ENSMUSG00000024376	Epb41l4a	3853	0.931737	0.714498	0.03335
ENSMUST00000162134	ENSMUSG00000006463	Zdhhc24	2314	1.41259	0.703674	0.02775
ENSMUST00000028062	ENSMUSG00000026728	Vim	2193	16.5202	13.5802	0.00985
ENSMUST00000090680	ENSMUSG00000027905	Ddx20	2905	6.42654	7.73409	0.02015
ENSMUST00000166104	ENSMUSG00000015536	Mocs2	1193	21.5798	37.5486	0.00865
ENSMUST00000028069	ENSMUSG00000026736	4930426L09Rik	1459	0.543026	0.289195	0.0188
ENSMUST00000038404	ENSMUSG00000042417	Ccno	1876	0.957928	0.437862	0.0003
ENSMUST00000038407	ENSMUSG00000034839	Larp6	2440	16.3612	13.7775	0.019
ENSMUST00000035106	ENSMUSG00000032519	Slc25a38	1791	9.6478	11.4391	0.0366
ENSMUST00000056740	ENSMUSG00000046167	Gldn	4658	0.449338	0.331259	0.04225
ENSMUST00000055032	ENSMUSG00000056673	Kdm5d	7974	2.64696	1.95438	0.04055
ENSMUST00000089174	ENSMUSG00000068114	Ccdc134	2043	2.39347	3.10696	0.01335
ENSMUST00000162645	ENSMUSG00000007817	Zmiz1	7482	4.22809	5.30483	0.00785
ENSMUST00000003512	ENSMUSG00000003420	Fcgrt	1738	9.0655	7.32697	0.01195
ENSMUST00000168722	ENSMUSG00000059586	Nsmce2	2729	5.03813	6.16826	0.03325
ENSMUST00000029423	ENSMUSG00000027834	Serpini1	4091	138.886	158.653	0.04525
ENSMUST00000182384	ENSMUSG00000040875	Osbpl10	2158	2.69723	1.26911	0.0033
ENSMUST00000077938	ENSMUSG00000061046	Haghl	1405	46.2552	35.6144	0.0115
ENSMUST00000111067	ENSMUSG00000020593	Lpin1	5626	2.361	2.9297	0.04965
ENSMUST00000000896	ENSMUSG00000000876	Pxmp4	2789	4.63805	3.75729	0.01775
ENSMUST00000031483	ENSMUSG00000029507	Pus1	1814	5.35286	3.98297	0.01045
ENSMUST00000000543	ENSMUSG00000000531	Grasp	2013	13.9659	17.605	0.0077
ENSMUST00000068700	ENSMUSG00000066357	Wdr6	4163	50.0831	42.0633	0.0139
ENSMUST00000054294	ENSMUSG00000044674	Fzd1	4197	3.38516	4.07666	0.0231
ENSMUST00000031486	ENSMUSG00000029513	Prkab1	2089	2.05082	1.37732	0.0313
ENSMUST00000189400	ENSMUSG00000025931	Paqr8	5330	20.3577	23.9205	0.0328
ENSMUST00000108140	ENSMUSG00000020684	Rasl10b	3156	52.8825	46.177	0.04625
ENSMUST00000016323	ENSMUSG00000016179	Camk1g	2469	12.2758	16.0897	0.0003
ENSMUST00000128478	ENSMUSG00000001034	Mapk7	4238	0.846097	0.528732	0.0304
ENSMUST00000067880	ENSMUSG00000054693	Adam10	4593	16.6768	20.2312	0.011
ENSMUST00000068387	ENSMUSG00000055024	Ep300	9566	4.79051	6.16237	0.00415
ENSMUST00000031002	ENSMUSG00000029119	Man2b2	3330	5.07567	4.15888	0.0163
ENSMUST00000164773	ENSMUSG00000020205	Phlda1	1949	1.91938	2.60424	0.02575
ENSMUST00000112168	ENSMUSG00000094891	Olfr55	948	0.281805	0.571982	0.03775
ENSMUST00000023270	ENSMUSG00000022604	Cep97	7911	3.43833	4.09758	0.03575
ENSMUST00000043716	ENSMUSG00000021276	Cinp	2029	24.5025	28.4207	0.0359
ENSMUST00000000769	ENSMUSG00000000753	Serpinf1	1832	7.28906	5.83455	0.03565
ENSMUST00000044113	ENSMUSG00000036698	Ago2	13705	5.91239	7.74027	0.00025
ENSMUST00000022272	ENSMUSG00000021752	Kctd6	1646	11.471	14.7468	0.01075
ENSMUST00000044068	ENSMUSG00000039456	Morc3	4178	9.80689	12.0106	0.0067
ENSMUST00000023283	ENSMUSG00000022614	Lmf2	2906	2.14884	1.72702	0.0349
ENSMUST00000055211	ENSMUSG00000045201	Lrrc3b	1658	4.88627	7.09726	0.00545
ENSMUST00000160648	ENSMUSG00000004896	Rrnad1	3157	1.87264	0.926753	0.04245
ENSMUST00000124280	ENSMUSG00000037447	Arid5a	3118	0.420275	0.198217	0.02745
ENSMUST00000048002	ENSMUSG00000055629	B4galnt4	3105	14.7358	12.3892	0.01605
ENSMUST00000020655	ENSMUSG00000020387	Jade2	6273	7.28467	9.86719	0.00315
ENSMUST00000026550	ENSMUSG00000025477	Inpp5a	2774	0.779012	2.19111	0.00795
ENSMUST00000049572	ENSMUSG00000024781	Lipa	2969	6.4522	8.63109	0.0018
ENSMUST00000022734	ENSMUSG00000022136	Dnajc3	5190	17.6674	23.8772	5e-05
ENSMUST00000112346	ENSMUSG00000034780	B3galt1	4977	7.79117	9.35002	0.0226
ENSMUST00000106621	ENSMUSG00000041623	D11Wsu47e	2062	3.25064	2.24821	0.0096
ENSMUST00000045224	ENSMUSG00000038007	Acer2	4216	1.31486	2.02277	0.00015
ENSMUST00000122199	ENSMUSG00000040732	Erg	2007	0.73318	0.354844	0.01065
ENSMUST00000034232	ENSMUSG00000031780	Ccl17	513	7.79087	5.17343	0.0105
ENSMUST00000030198	ENSMUSG00000028476	Reck	4433	1.6218	1.12859	0.0009
ENSMUST00000204617	ENSMUSG00000009394	Syn2	3257	47.3268	65.4197	0.00665
ENSMUST00000113113	ENSMUSG00000046432	Ngfrap1	766	45.4946	28.9723	0.01555
ENSMUST00000027377	ENSMUSG00000026185	Igfbp5	6006	20.1889	17.6312	0.04755
ENSMUST00000125748	ENSMUSG00000064247	Plcxd1	3177	3.22892	2.05739	0.0362
ENSMUST00000179734	ENSMUSG00000095779	Gm2163	2723	11.1553	13.13	0.0251
ENSMUST00000017692	ENSMUSG00000017548	Suz12	4373	10.6886	13.0361	0.01395
ENSMUST00000037983	ENSMUSG00000038619	Ensa	3845	47.9374	58.5171	0.026
ENSMUST00000194649	ENSMUSG00000039221	Rpl22l1	525	152.585	183.389	0.0375
ENSMUST00000036211	ENSMUSG00000041468	Gpr12	2219	2.09829	1.27957	0.02695
ENSMUST00000023453	ENSMUSG00000022769	Sdf2l1	1108	9.41648	18.9038	5e-05
ENSMUST00000041982	ENSMUSG00000037548	H2-DMb2	1347	1.40823	0.861031	0.00625
ENSMUST00000023457	ENSMUSG00000022772	Senp5	3498	14.1834	17.7901	0.00305
ENSMUST00000107803	ENSMUSG00000034349	Smc4	3983	0.182379	0.977483	0.04565
ENSMUST00000107802	ENSMUSG00000034317	Trim59	2939	2.75192	3.38877	0.02415
ENSMUST00000113343	ENSMUSG00000079450	Cldn34c1	3301	1.04093	0.659916	0.0375
ENSMUST00000197021	ENSMUSG00000055204	Ankrd17	8067	7.69391	9.95889	0.03945
ENSMUST00000088419	ENSMUSG00000022139	Mbnl2	4552	25.7798	33.3948	0.0347
ENSMUST00000095147	ENSMUSG00000025815	Dhtkd1	5480	0.975882	0.708939	0.0257
ENSMUST00000118576	ENSMUSG00000041609	Ccdc64	1874	3.55871	2.01565	0.0272
ENSMUST00000167323	ENSMUSG00000090698	Apold1	3567	2.28484	1.67313	0.00145
ENSMUST00000167327	ENSMUSG00000015143	Actn1	2664	6.89168	9.12523	0.0435
ENSMUST00000121532	ENSMUSG00000060538	Tmem219	915	1.52518	2.73699	0.0469
ENSMUST00000153360	ENSMUSG00000047989	Ino80c	2498	10.6815	9.18106	0.0459
ENSMUST00000117217	ENSMUSG00000021224	Numb	3549	10.1879	12.4782	0.008
ENSMUST00000010804	ENSMUSG00000010660	Plcd1	2651	3.35928	2.50429	0.00535
ENSMUST00000105097	ENSMUSG00000032846	Zswim6	5457	7.8969	9.13295	0.04
ENSMUST00000153369	ENSMUSG00000028341	Nr4a3	5068	2.72536	6.39957	5e-05
ENSMUST00000192307	ENSMUSG00000032599	Ip6k2	1191	6.42946	3.3011	0.04085
ENSMUST00000085840	ENSMUSG00000090100	Ttbk2	11152	7.38569	5.19543	0.0305
ENSMUST00000099265	ENSMUSG00000074738	B930041F14Rik	2140	11.4379	9.39913	0.0113
ENSMUST00000065302	ENSMUSG00000064128	Cenpj	4363	0.904854	1.17167	0.01735
ENSMUST00000035481	ENSMUSG00000037938	Chchd5	1325	5.89947	4.68763	0.0354
ENSMUST00000193287	ENSMUSG00000027667	Zfp639	2211	3.09332	4.38461	0.0357
ENSMUST00000195354	ENSMUSG00000016200	Syt14	7882	4.60378	5.59233	0.01135
ENSMUST00000195355	ENSMUSG00000036422	Pcdh8	3704	2.06558	3.20487	0.043
ENSMUST00000130187	ENSMUSG00000046671	Mtfr1l	4085	1.57477	0.863991	0.01625
ENSMUST00000037964	ENSMUSG00000039891	Txlnb	4422	0.748211	0.533197	0.00955
ENSMUST00000045713	ENSMUSG00000041073	Nacad	4892	5.38699	4.57803	0.0354
ENSMUST00000020343	ENSMUSG00000020132	Rab21	1823	30.496	35.5294	0.0261
ENSMUST00000182717	ENSMUSG00000034206	Polq	2202	0.714234	0.262977	0.00315
ENSMUST00000105271	ENSMUSG00000020151	Ptprr	2856	2.22538	1.42381	0.03325
ENSMUST00000095328	ENSMUSG00000079057	Cyp4v3	3806	2.56988	2.12208	0.04335
ENSMUST00000110522	ENSMUSG00000021071	Trim9	4663	26.761	31.9909	0.0175
ENSMUST00000154469	ENSMUSG00000040532	Abhd11	1473	7.10237	5.31749	0.03625
ENSMUST00000053273	ENSMUSG00000030287	Itpr2	8331	1.40192	1.0206	0.0192
ENSMUST00000165033	ENSMUSG00000038418	Egr1	3036	15.2506	26.2421	5e-05
ENSMUST00000099084	ENSMUSG00000039671	Zmynd8	5232	5.87776	8.92575	0.00605
ENSMUST00000167199	ENSMUSG00000024683	Mrpl16	1122	21.0729	18.0154	0.0493
ENSMUST00000005607	ENSMUSG00000005470	Asf1b	1788	0.54661	0.259251	0.0067
ENSMUST00000140570	ENSMUSG00000033411	Ctdspl2	3543	1.86475	3.52466	0.0064
ENSMUST00000084264	ENSMUSG00000053841	Txlna	4847	3.39948	5.40073	0.00255
ENSMUST00000176600	ENSMUSG00000029647	Pan3	5541	4.15575	6.09135	0.0054
ENSMUST00000035065	ENSMUSG00000032487	Ptgs2	4453	3.7486	5.47396	5e-05
ENSMUST00000206598	ENSMUSG00000010095	Slc3a2	1393	4.96789	2.26511	0.04225
ENSMUST00000136591	ENSMUSG00000044224	Dnajc21	2060	12.7557	16.6323	0.00205
ENSMUST00000025932	ENSMUSG00000024976	Shoc2	4106	20.6595	25.4093	0.04765
ENSMUST00000056136	ENSMUSG00000044708	Kcnj10	5407	17.1192	14.774	0.0299
ENSMUST00000055738	ENSMUSG00000031431	Tsc22d3	1974	14.0437	25.3661	5e-05
ENSMUST00000124925	ENSMUSG00000039307	Hexdc	3921	4.25102	3.27418	0.0425
ENSMUST00000079252	ENSMUSG00000060733	Ipmk	5447	7.674	9.52896	0.00335
ENSMUST00000109177	ENSMUSG00000027546	Atp9a	3456	39.5345	52.5546	0.03225
ENSMUST00000052678	ENSMUSG00000025278	Flnb	9100	7.96696	6.59638	0.0064
ENSMUST00000042299	ENSMUSG00000034402	Kcnh5	4061	17.8035	20.9526	0.01675
ENSMUST00000039726	ENSMUSG00000035868	3110052M02Rik	1383	5.34667	6.92463	0.0077
ENSMUST00000182625	ENSMUSG00000051817	Sox12	4453	1.9608	1.54846	0.0147
ENSMUST00000035110	ENSMUSG00000032523	Hhatl	1870	3.47846	2.54031	0.0084
ENSMUST00000035115	ENSMUSG00000032528	Vipr1	4902	4.77508	5.66106	0.0268
ENSMUST00000186380	ENSMUSG00000042699	Dhx9	4561	1.14996	2.87334	0.00445
ENSMUST00000071402	ENSMUSG00000041220	Elovl6	5951	10.6887	14.7	5e-05
ENSMUST00000025842	ENSMUSG00000024907	Gal	712	2.97933	1.82973	0.00915
ENSMUST00000025847	ENSMUSG00000024911	Fibp	1240	21.0969	17.3649	0.0126
ENSMUST00000176204	ENSMUSG00000092035	Peg10	6667	3.88735	0.424203	5e-05
ENSMUST00000189361	ENSMUSG00000026458	Ppfia4	5238	3.1554	2.31549	0.04455
ENSMUST00000043675	ENSMUSG00000038717	Atp5l	511	532.297	612.66	0.03275
ENSMUST00000040514	ENSMUSG00000038894	Irs2	4024	6.81828	9.62899	0.0001
ENSMUST00000025110	ENSMUSG00000024261	Syt4	3901	82.3705	95.5443	0.024
ENSMUST00000102870	ENSMUSG00000020290	Xpo1	3471	18.0676	22.8717	0.038
ENSMUST00000182024	ENSMUSG00000025427	Rnf165	4309	1.2821	2.12417	0.01205
ENSMUST00000022316	ENSMUSG00000021791	Dydc2	592	1.34007	2.23253	0.03665
ENSMUST00000022646	ENSMUSG00000022061	Nkx3-1	3195	0.840765	0.522714	0.0012
ENSMUST00000039431	ENSMUSG00000059146	Ntrk3	19703	8.61197	10.9203	0.0036
ENSMUST00000063084	ENSMUSG00000020484	Xbp1	2129	39.5526	55.7528	5e-05
ENSMUST00000114299	ENSMUSG00000031328	Flna	8456	4.6393	3.22855	0.00295
ENSMUST00000075052	ENSMUSG00000059742	Kcnh7	13321	17.1661	21.0062	0.00445
ENSMUST00000019503	ENSMUSG00000019359	Gdpd2	2495	1.1669	0.758144	0.04155
ENSMUST00000047028	ENSMUSG00000042363	Lgalsl	3362	36.8468	42.5655	0.03
ENSMUST00000161058	ENSMUSG00000038368	Focad	1430	1.28379	3.13661	0.0287
ENSMUST00000152888	ENSMUSG00000028708	Mknk1	1686	1.96752	1.04983	0.0475
ENSMUST00000021447	ENSMUSG00000021051	Ppp2r5e	4808	14.6701	17.7709	0.0046
ENSMUST00000068714	ENSMUSG00000024241	Sos1	8919	7.15052	8.84624	0.0023
ENSMUST00000042470	ENSMUSG00000030757	Zkscan2	7831	2.85712	2.12032	0.00085
ENSMUST00000114160	ENSMUSG00000001962	Fam50a	1383	10.6134	7.98195	0.0019
ENSMUST00000021322	ENSMUSG00000055805	Fmnl1	2830	4.91787	7.83317	0.00055
ENSMUST00000067543	ENSMUSG00000032501	Trib1	3781	2.59677	3.333	0.0073
ENSMUST00000054867	ENSMUSG00000039904	Gpr37	4974	12.3207	10.0058	0.0061
ENSMUST00000079812	ENSMUSG00000027878	Notch2	10500	2.53522	2.12437	0.02215
ENSMUST00000026818	ENSMUSG00000025724	Sec11a	1345	15.4831	19.3302	0.03015
ENSMUST00000164766	ENSMUSG00000022176	Rem2	1884	5.29242	4.08313	0.00505
ENSMUST00000030691	ENSMUSG00000061601	Pclo	20084	7.41495	9.5641	0.0328
ENSMUST00000189185	ENSMUSG00000100967	Gm29666	8038	0.682375	0.462916	0.0008
ENSMUST00000069284	ENSMUSG00000022788	Fgd4	2637	1.5456	3.39589	0.0281
ENSMUST00000027783	ENSMUSG00000026502	Desi2	8802	2.66766	3.35331	0.0108
ENSMUST00000026494	ENSMUSG00000025427	Rnf165	7300	1.07239	1.45004	0.04215
ENSMUST00000107123	ENSMUSG00000020923	Ubtf	2759	12.638	17.0926	0.0258
ENSMUST00000136680	ENSMUSG00000003382	Etv3	7263	1.1023	0.704632	0.0258
ENSMUST00000122960	ENSMUSG00000038354	Ankrd35	3295	2.92197	2.09787	0.0124
ENSMUST00000107010	ENSMUSG00000032812	Arap1	5147	1.4881	1.08145	0.04765
ENSMUST00000040001	ENSMUSG00000033316	Galnt9	2883	14.0718	20.3655	5e-05
ENSMUST00000110559	ENSMUSG00000019726	Lyst	11806	13.0592	15.2259	0.01805
ENSMUST00000051039	ENSMUSG00000051705	Senp8	3682	2.38798	3.32796	0.0005
ENSMUST00000016172	ENSMUSG00000016028	Celsr1	11050	0.667112	0.550347	0.04195
ENSMUST00000065162	ENSMUSG00000037339	Fam53a	8219	0.568849	0.356139	0.02035
ENSMUST00000102665	ENSMUSG00000076439	Mog	1704	18.2502	14.5034	0.00275
ENSMUST00000065169	ENSMUSG00000036180	Gatad2a	5208	1.05807	0.508219	0.00265
ENSMUST00000102661	ENSMUSG00000010086	Rnf112	3118	33.9421	24.9832	0.0056
ENSMUST00000113759	ENSMUSG00000026790	Odf2	3807	2.84531	1.57589	0.0238
ENSMUST00000064948	ENSMUSG00000052861	Dnah6	12652	1.05671	0.805878	0.02585
ENSMUST00000010698	ENSMUSG00000010554	Mettl16	2073	4.41053	6.48718	0.0211
ENSMUST00000026565	ENSMUSG00000025492	Ifitm3	678	5.88688	3.92549	0.00585
ENSMUST00000051589	ENSMUSG00000025894	Aasdhppt	2870	15.5627	17.9568	0.0416
ENSMUST00000045235	ENSMUSG00000042742	B630005N14Rik	4143	14.8284	18.2111	0.0037
ENSMUST00000106638	ENSMUSG00000055320	Tead1	3047	0.309704	0.616523	0.02705
ENSMUST00000037198	ENSMUSG00000041153	Osgin2	2658	6.51263	8.31035	0.00965
ENSMUST00000115011	ENSMUSG00000001143	Lman2l	2290	3.17517	4.36531	0.02345
ENSMUST00000064016	ENSMUSG00000052229	Gpr17	5195	6.39107	8.06818	0.00265
ENSMUST00000040914	ENSMUSG00000036181	Hist1h1c	1560	33.1496	27.5718	0.0108
ENSMUST00000054245	ENSMUSG00000020701	Tmem132e	4386	3.31898	2.50411	0.02175
ENSMUST00000023555	ENSMUSG00000022849	Hspbap1	4590	0.975625	1.41483	0.00035
ENSMUST00000061008	ENSMUSG00000040473	Cfap69	1906	0.830374	1.56795	0.04135
ENSMUST00000030980	ENSMUSG00000029097	Trmt44	2680	1.74777	2.4475	0.00285
ENSMUST00000030984	ENSMUSG00000029101	Rgs12	5472	2.15803	1.34536	0.02445
ENSMUST00000027367	ENSMUSG00000026176	Ctdsp1	2876	4.42845	3.5112	0.01125
ENSMUST00000037287	ENSMUSG00000037664	Cdkn1c	1893	3.06271	1.91378	0.0026
ENSMUST00000060714	ENSMUSG00000050148	Ubqln2	3344	24.1475	30.6084	0.0005
ENSMUST00000015791	ENSMUSG00000015647	Lama5	11388	0.91103	0.620785	0.0002
ENSMUST00000049699	ENSMUSG00000048310	Pskh1	3255	3.64621	2.43975	5e-05
ENSMUST00000171394	ENSMUSG00000073805	Fam196a	4619	2.57508	3.46667	0.0447
ENSMUST00000191142	ENSMUSG00000026020	Nop58	9507	6.34955	5.3057	0.0367
ENSMUST00000022918	ENSMUSG00000022307	Oxr1	4232	9.20433	19.1552	0.0011
ENSMUST00000112751	ENSMUSG00000057329	Bcl2	7191	3.95915	5.03739	0.0015
ENSMUST00000050183	ENSMUSG00000034485	Uaca	4428	2.53657	2.13036	0.045
ENSMUST00000034776	ENSMUSG00000032245	Cln6	2142	3.85524	2.82318	0.00175
ENSMUST00000027217	ENSMUSG00000026051	1500015O10Rik	902	1.71478	3.75333	0.0003
ENSMUST00000106746	ENSMUSG00000020721	Helz	13147	3.80403	5.03297	0.0007
ENSMUST00000166950	ENSMUSG00000078974	Sec61g	754	68.5599	84.2193	0.0246
ENSMUST00000179893	ENSMUSG00000030592	Ryr1	15362	1.15766	0.961103	0.02025
ENSMUST00000036555	ENSMUSG00000033590	Myo5c	6733	0.581691	0.431323	0.0158
ENSMUST00000041407	ENSMUSG00000036169	Sostdc1	1751	0.677468	1.06405	0.01105
ENSMUST00000015433	ENSMUSG00000015289	Lage3	761	17.6894	14.2253	0.02885
ENSMUST00000036003	ENSMUSG00000040102	Klhl42	6267	9.62282	11.0786	0.03845
ENSMUST00000033058	ENSMUSG00000038371	Sbf2	7154	6.60997	3.95365	0.00945
ENSMUST00000005014	ENSMUSG00000004894	Hapln2	1711	2.2978	1.49388	0.01305
ENSMUST00000078272	ENSMUSG00000040118	Cacna2d1	7311	13.4955	21.9879	0.0044
ENSMUST00000107906	ENSMUSG00000062785	Kcnc3	5058	3.78314	5.58688	0.0039
ENSMUST00000017488	ENSMUSG00000017344	Vtn	1744	33.7503	29.2783	0.04605
ENSMUST00000087176	ENSMUSG00000050121	Opalin	1838	8.71651	4.63874	5e-05
ENSMUST00000062045	ENSMUSG00000051627	Hist1h1e	748	68.742	54.3996	0.0025
ENSMUST00000180140	ENSMUSG00000023904	Hcfc1r1	693	34.0993	27.1837	0.03315
ENSMUST00000191138	ENSMUSG00000015501	Hivep2	9846	6.97499	9.84182	0.02365
ENSMUST00000036489	ENSMUSG00000039968	Rsbn1l	5550	5.02588	5.91104	0.045
ENSMUST00000117221	ENSMUSG00000027849	Syt6	4394	1.61845	0.906174	0.04255
ENSMUST00000192318	ENSMUSG00000032936	Camkv	3253	17.9777	9.17198	0.00985
ENSMUST00000032272	ENSMUSG00000030168	Adipor2	4184	12.7735	16.6425	0.00065
ENSMUST00000018002	ENSMUSG00000017858	Ift52	2248	7.74851	6.16173	0.0107
ENSMUST00000097742	ENSMUSG00000073680	Tmem88b	3471	7.16923	5.68262	0.00325
ENSMUST00000032696	ENSMUSG00000055305	Zfp93	2324	3.46161	4.58769	0.04085
ENSMUST00000032877	ENSMUSG00000030641	Ddias	3349	0.460174	0.263022	0.0037
ENSMUST00000005077	ENSMUSG00000004951	Hspb1	903	5.06987	9.16685	5e-05
ENSMUST00000022693	ENSMUSG00000022098	Bmp1	3757	7.14878	6.13305	0.04515
ENSMUST00000091641	ENSMUSG00000021431	Snrnp48	1789	7.47096	8.91174	0.03475
ENSMUST00000167058	ENSMUSG00000034751	Mast4	10636	1.57399	2.24223	0.02745
ENSMUST00000020358	ENSMUSG00000020149	Rab1a	2827	45.8554	36.3368	0.0188
ENSMUST00000080511	ENSMUSG00000058773	Hist1h1b	743	6.78099	8.88948	0.0193
ENSMUST00000049353	ENSMUSG00000037243	Zfp692	1860	6.24576	4.95455	0.0392
ENSMUST00000049355	ENSMUSG00000042688	Mapk6	4072	15.4569	18.6413	0.0149
ENSMUST00000114547	ENSMUSG00000032076	Cadm1	4444	11.617	6.34278	0.03515
ENSMUST00000085585	ENSMUSG00000066568	Lsm14a	2944	16.1389	19.3221	0.01435
ENSMUST00000002599	ENSMUSG00000002524	Puf60	1861	26.8432	38.0107	0.00635
ENSMUST00000098230	ENSMUSG00000073982	Rhog	1269	3.61167	2.80934	0.0402
ENSMUST00000038730	ENSMUSG00000033383	Rtp1	3120	0.236331	0.718969	5e-05
ENSMUST00000053266	ENSMUSG00000041859	Mcm3	3031	0.870004	0.638783	0.04315
ENSMUST00000035908	ENSMUSG00000033730	Egr3	1416	8.62621	11.1653	0.00225
ENSMUST00000039286	ENSMUSG00000038160	Atg5	2352	13.1267	15.6316	0.0176
ENSMUST00000155901	ENSMUSG00000034724	Cnot6l	8564	7.85471	9.63214	0.00745
ENSMUST00000047144	ENSMUSG00000036046	5031439G07Rik	6845	6.39804	8.78225	0.00245
ENSMUST00000001802	ENSMUSG00000001751	Naglu	2560	3.12667	2.41543	0.00885
ENSMUST00000151288	ENSMUSG00000079020	Slc45a4	7509	2.75733	3.60604	0.00975
ENSMUST00000151289	ENSMUSG00000040451	Sgms1	2488	4.27352	6.73824	0.0221
ENSMUST00000035721	ENSMUSG00000039449	Prpf18	3522	15.2581	18.0249	0.03505
ENSMUST00000178948	ENSMUSG00000094114	Gm21967	1648	6.46621	8.66799	0.0089
ENSMUST00000025691	ENSMUSG00000024778	Fas	1486	0.72299	1.04701	0.0462
ENSMUST00000056129	ENSMUSG00000045903	Npas4	3277	6.96887	4.15297	5e-05
ENSMUST00000079242	ENSMUSG00000051341	Zfp52	2175	3.57096	4.53029	0.00965
ENSMUST00000005103	ENSMUSG00000029832	Nfe2l3	2544	4.05124	2.91094	0.00065
ENSMUST00000105466	ENSMUSG00000019916	P4ha1	2918	10.4738	18.8861	5e-05
ENSMUST00000067404	ENSMUSG00000040242	Fgfr1op2	2766	36.3185	43.4734	0.02475
ENSMUST00000165205	ENSMUSG00000090958	Lrrc32	3817	0.467098	0.243904	0.0049
ENSMUST00000035121	ENSMUSG00000032531	Amotl2	4328	3.86936	3.11995	0.0365
ENSMUST00000055698	ENSMUSG00000046352	Gjb2	2406	2.74988	2.15483	0.019
ENSMUST00000025850	ENSMUSG00000024912	Fosl1	1707	2.16491	1.56151	0.01065
ENSMUST00000006105	ENSMUSG00000005951	Shpk	2808	1.57646	1.16351	0.00845
ENSMUST00000025078	ENSMUSG00000024235	Map3k8	2507	0.688773	0.983114	0.0247
ENSMUST00000123774	ENSMUSG00000033809	Alg3	1308	1.01963	0.427489	0.03305
ENSMUST00000124158	ENSMUSG00000039652	Cpeb3	4811	6.04557	8.90554	0.0061
ENSMUST00000159679	ENSMUSG00000040113	Mettl11b	1790	0.402783	0.695245	0.01075
ENSMUST00000118310	ENSMUSG00000044442	N6amt1	1700	1.38271	0.589066	0.04735
ENSMUST00000125964	ENSMUSG00000005575	Ube2m	801	6.343	12.5728	0.043
ENSMUST00000057942	ENSMUSG00000047259	Mc4r	2758	1.03726	1.57129	0.00045
ENSMUST00000057836	ENSMUSG00000049755	Zfp672	2862	2.62043	4.55232	0.0208
ENSMUST00000019516	ENSMUSG00000075590	Nrbp2	2495	16.7417	13.7878	0.00755
ENSMUST00000118539	ENSMUSG00000028179	Cth	1815	1.879	2.58684	0.00745
ENSMUST00000192561	ENSMUSG00000058729	Lin9	3160	1.72887	2.32627	0.0087
ENSMUST00000003310	ENSMUSG00000003226	Ranbp2	9477	47.0504	54.6578	0.021
ENSMUST00000022451	ENSMUSG00000021893	Capn7	3648	15.6778	19.4761	0.01485
ENSMUST00000082088	ENSMUSG00000059401	Mamld1	4796	3.47372	4.11699	0.0363
ENSMUST00000169079	ENSMUSG00000027550	Lrrcc1	5638	3.13985	2.16405	0.00185
ENSMUST00000003318	ENSMUSG00000003233	Dvl3	2498	2.88748	3.75568	0.0303
ENSMUST00000022075	ENSMUSG00000021587	Pcsk1	2677	20.4273	29.7579	5e-05
ENSMUST00000187137	ENSMUSG00000036634	Mag	2434	31.1306	22.191	5e-05
ENSMUST00000081342	ENSMUSG00000094777	Hist1h2ap	482	5.40915	8.19827	0.01135
ENSMUST00000079601	ENSMUSG00000013089	Etv5	3975	23.6424	31.99	5e-05
ENSMUST00000029911	ENSMUSG00000028248	Pnisr	4545	21.0776	16.233	0.03715
ENSMUST00000089622	ENSMUSG00000034832	Tet3	10904	3.05176	4.22722	5e-05
ENSMUST00000034728	ENSMUSG00000032198	Dock6	6556	0.813198	0.617658	0.01105
ENSMUST00000063879	ENSMUSG00000052151	Ppap2c	1645	1.70811	1.08084	0.0042
ENSMUST00000069292	ENSMUSG00000030145	Zfp248	3683	3.32563	4.16835	0.02325
ENSMUST00000108345	ENSMUSG00000047213	Ythdf3	5102	13.9928	18.1624	0.0023
ENSMUST00000115390	ENSMUSG00000072082	Ccnf	3099	1.35291	1.99032	0.00025
ENSMUST00000154650	ENSMUSG00000013523	Bcas1	2222	18.4926	14.8288	0.00575
ENSMUST00000044730	ENSMUSG00000038437	Mllt6	7274	20.3385	16.9586	0.0288
ENSMUST00000015894	ENSMUSG00000015750	Aph1a	2863	4.5998	3.4782	0.04935
ENSMUST00000026976	ENSMUSG00000025858	Get4	2107	13.7024	10.9148	0.01
ENSMUST00000201489	ENSMUSG00000037795	N4bp2	9055	0.976007	1.27797	0.0143
ENSMUST00000108297	ENSMUSG00000049225	Pdp1	4201	31.8705	42.8349	0.00435
ENSMUST00000094693	ENSMUSG00000021134	Srsf5	1527	86.5333	62.6785	0.0333
ENSMUST00000074156	ENSMUSG00000026807	Ak8	1567	1.26801	0.901005	0.03775
ENSMUST00000030420	ENSMUSG00000028661	Epha8	4713	0.933678	0.700931	0.01515
ENSMUST00000108299	ENSMUSG00000049225	Pdp1	2588	11.5465	20.7415	0.0035
ENSMUST00000023509	ENSMUSG00000062901	Klhl24	6683	29.0271	33.7518	0.0199
ENSMUST00000102514	ENSMUSG00000045287	Rtn4rl1	3525	9.48792	11.2574	0.02025
ENSMUST00000136848	ENSMUSG00000021224	Numb	567	6.26724	12.7508	0.02255
ENSMUST00000020980	ENSMUSG00000020649	Rrm2	2193	0.794546	0.568852	0.04835
ENSMUST00000020982	ENSMUSG00000020653	Klf11	3974	3.6253	2.33424	5e-05
ENSMUST00000020985	ENSMUSG00000020656	Grhl1	3070	2.10944	2.88186	0.02505
ENSMUST00000020630	ENSMUSG00000020361	Hspa4	4618	68.6688	81.7512	0.0068
ENSMUST00000057194	ENSMUSG00000046417	Lrrc75a	1984	7.45768	8.81278	0.04645
ENSMUST00000115026	ENSMUSG00000029761	Cald1	4080	1.41587	0.866597	0.0089
ENSMUST00000084530	ENSMUSG00000066152	Slc31a2	1820	3.36117	4.53118	0.00275
ENSMUST00000060010	ENSMUSG00000044367	Slc16a13	2531	1.52679	1.15377	0.0265
ENSMUST00000030731	ENSMUSG00000028899	Taf12	3787	3.16707	4.24563	0.0015
ENSMUST00000194538	ENSMUSG00000032586	Traip	3680	0.720626	0.461197	0.0457
ENSMUST00000143432	ENSMUSG00000040690	Col16a1	5138	0.72697	0.298947	0.01805
ENSMUST00000165561	ENSMUSG00000091264	Smim13	4464	70.4615	81.7241	0.02165
ENSMUST00000165566	ENSMUSG00000040929	Rfx3	9146	11.095	12.8875	0.04625
ENSMUST00000010597	ENSMUSG00000010453	Kansl3	4663	10.2165	12.4783	0.01195
ENSMUST00000151982	ENSMUSG00000000632	Sez6	3424	6.4457	9.25185	0.0335
ENSMUST00000020749	ENSMUSG00000020459	Mtif2	2425	2.23954	4.19262	0.0176
ENSMUST00000037708	ENSMUSG00000033007	Asic4	2464	7.66051	5.93857	0.00995
ENSMUST00000202639	ENSMUSG00000106864	Gtf3c2	4200	1.64751	0.61356	0.00995
ENSMUST00000051377	ENSMUSG00000043671	Dpy19l3	8006	6.54666	7.71211	0.02025
ENSMUST00000046977	ENSMUSG00000039167	Adgrl4	4106	3.86459	4.59568	0.03735
ENSMUST00000060125	ENSMUSG00000046480	Scn4b	4940	53.9061	45.8079	0.01305
ENSMUST00000033335	ENSMUSG00000031023	Akip1	1028	3.10079	2.07213	0.00835
ENSMUST00000189062	ENSMUSG00000079330	Lemd1	1585	1.88421	0.857025	0.01405
ENSMUST00000077609	ENSMUSG00000030795	Fus	1831	10.12	6.63831	0.02255
ENSMUST00000129449	ENSMUSG00000087370	Tmem170b	7160	18.3052	21.1663	0.02945
ENSMUST00000076951	ENSMUSG00000061654	Spry3	4349	2.54022	3.6533	5e-05
ENSMUST00000138302	ENSMUSG00000047731	Wbp1l	3900	4.26685	3.14021	0.0493
ENSMUST00000048112	ENSMUSG00000042216	Sgsm1	5161	17.3807	19.8674	0.0493
ENSMUST00000163324	ENSMUSG00000037536	Fbxo34	3132	3.85128	1.80298	0.0097
ENSMUST00000026013	ENSMUSG00000025037	Maoa	4167	15.0459	13.0078	0.03555
ENSMUST00000124566	ENSMUSG00000030872	Gga2	4251	2.38268	3.51031	0.0144
ENSMUST00000166497	ENSMUSG00000025277	Abhd6	2018	19.0587	22.4901	0.0232
ENSMUST00000164891	ENSMUSG00000018648	Dusp14	1454	9.60725	16.0415	0.0032
ENSMUST00000021903	ENSMUSG00000021453	Gadd45g	1071	12.2262	9.21012	0.0018
ENSMUST00000033427	ENSMUSG00000031101	Sash3	2677	0.763893	1.00097	0.0494
ENSMUST00000103205	ENSMUSG00000027395	Polr1b	3998	4.1532	5.18087	0.00605
ENSMUST00000199470	ENSMUSG00000039103	Nexn	2392	0.979238	0.545486	0.0061
ENSMUST00000023722	ENSMUSG00000022987	Zfp641	4212	2.50648	1.94196	0.0474
ENSMUST00000044954	ENSMUSG00000037434	Slc30a1	5244	14.7448	12.8175	0.04255
ENSMUST00000115808	ENSMUSG00000041915	Ammecr1l	4769	3.61083	4.49052	0.0138
ENSMUST00000161861	ENSMUSG00000022788	Fgd4	8342	10.3864	12.1027	0.0453
ENSMUST00000021761	ENSMUSG00000021326	Trim27	3923	5.84683	6.84017	0.04575
ENSMUST00000145313	ENSMUSG00000024220	Zfp523	3350	1.96193	1.07873	0.02995
ENSMUST00000046807	ENSMUSG00000037762	Slc16a9	3756	0.661501	0.436881	0.01545
ENSMUST00000035462	ENSMUSG00000038702	Dsel	5759	8.42276	9.77233	0.0352
ENSMUST00000100827	ENSMUSG00000030249	Abcc9	7306	0.781317	0.538609	0.0034
ENSMUST00000091636	ENSMUSG00000071862	Lrrtm2	5665	23.9155	28.3622	0.0333
ENSMUST00000035861	ENSMUSG00000005069	Pex5	3139	3.65192	6.57043	0.0004
ENSMUST00000045779	ENSMUSG00000034714	Ttyh2	3486	10.6155	8.40502	0.00235
ENSMUST00000114574	ENSMUSG00000024027	Glp1r	1480	0.475492	0.272214	0.039
ENSMUST00000163030	ENSMUSG00000038384	Setd1b	8857	1.01871	1.68705	0.0247
ENSMUST00000019982	ENSMUSG00000019837	Gtf3c6	1020	11.6485	9.56034	0.0322
ENSMUST00000049348	ENSMUSG00000032586	Traip	2706	2.56295	1.87535	0.01055
ENSMUST00000101208	ENSMUSG00000072941	Sod3	3738	0.651766	0.427585	0.0048
ENSMUST00000098758	ENSMUSG00000074342	I830077J02Rik	2599	0.421859	0.251102	0.01615
ENSMUST00000094216	ENSMUSG00000070462	Mesdc1	4433	4.60805	5.48507	0.02505
ENSMUST00000053218	ENSMUSG00000048826	Dact2	2808	21.7581	16.772	5e-05
ENSMUST00000058577	ENSMUSG00000049504	Proser1	4472	0.869355	1.13223	0.03595
ENSMUST00000039380	ENSMUSG00000040055	Gjb6	2105	27.5149	31.9986	0.03325
ENSMUST00000057224	ENSMUSG00000048038	4932418E24Rik	3148	0.873512	0.597949	0.0098
ENSMUST00000206753	ENSMUSG00000049553	Polr1a	3302	1.16274	2.03308	0.02615
ENSMUST00000109396	ENSMUSG00000035238	Kcnk15	1921	0.507536	0.290686	0.01525
ENSMUST00000196471	ENSMUSG00000029716	Tfr2	2839	1.13056	0.372238	0.04665
ENSMUST00000183482	ENSMUSG00000049511	Htr1b	4724	3.09747	4.16337	0.00095
ENSMUST00000005620	ENSMUSG00000005483	Dnajb1	2263	29.8094	40.8973	5e-05
ENSMUST00000101197	ENSMUSG00000030047	Arhgap25	2493	1.84117	2.87496	0.00525
ENSMUST00000072427	ENSMUSG00000057924	Gm10033	654	2.51719	3.62139	0.0353
ENSMUST00000084207	ENSMUSG00000071176	Arhgef10	5528	4.42202	3.28917	0.0093
ENSMUST00000094103	ENSMUSG00000070407	Hs3st3b1	4911	0.275183	0.406937	0.0134
ENSMUST00000176663	ENSMUSG00000037112	Sik2	4107	5.13399	6.9218	0.0155
ENSMUST00000080359	ENSMUSG00000029249	Rest	7004	0.570488	1.00429	0.0093
ENSMUST00000085953	ENSMUSG00000057229	Atp5sl	2387	2.13178	1.08262	0.01845
ENSMUST00000025918	ENSMUSG00000024966	Stip1	2173	91.0769	112.599	0.00145
ENSMUST00000149827	ENSMUSG00000002949	Timm44	3041	3.17896	2.12864	0.0216
ENSMUST00000002677	ENSMUSG00000002602	Axl	4265	8.09365	6.74031	0.01625
ENSMUST00000038099	ENSMUSG00000038037	Socs1	1220	0.884477	0.441345	0.007
ENSMUST00000053458	ENSMUSG00000050545	Fam228b	2886	4.9951	5.98332	0.0271
ENSMUST00000053459	ENSMUSG00000021411	Pxdc1	1863	2.3699	3.11046	0.0197
ENSMUST00000056484	ENSMUSG00000051790	Nlgn2	5003	15.8403	19.4783	0.01565
ENSMUST00000098592	ENSMUSG00000074215	Gm10643	1577	1.41091	1.01954	0.0358
ENSMUST00000028633	ENSMUSG00000027204	Fbn1	9847	1.42272	0.815873	5e-05
ENSMUST00000096241	ENSMUSG00000071647	Eml3	3161	2.11249	1.67891	0.024
ENSMUST00000115621	ENSMUSG00000031167	Rbm3	1338	26.6314	16.3033	0.0012
ENSMUST00000052580	ENSMUSG00000050751	Pgbd5	2824	26.3912	34.552	0.04685
ENSMUST00000052588	ENSMUSG00000047141	Zfp654	4741	8.43445	9.78355	0.03865
ENSMUST00000098576	ENSMUSG00000038535	Zfp280d	4387	6.96426	8.71774	0.0485
ENSMUST00000136664	ENSMUSG00000002007	Srpk3	2711	0.869541	0.604661	0.04185
ENSMUST00000055688	ENSMUSG00000047777	Phf13	3205	3.09281	3.98928	0.00435
ENSMUST00000038382	ENSMUSG00000042686	Jph1	4809	6.47133	5.5665	0.0433
ENSMUST00000008350	ENSMUSG00000008206	Cers4	9475	4.17395	2.92873	0.00025
ENSMUST00000162475	ENSMUSG00000033105	Lss	3969	1.22407	0.652688	0.03985
ENSMUST00000182191	ENSMUSG00000078350	Smim1	3535	2.03053	3.05406	0.04955
ENSMUST00000006112	ENSMUSG00000005958	Ephb3	4185	3.15988	4.12176	0.00205
ENSMUST00000102867	ENSMUSG00000039137	Whrn	4013	0.31666	0.648922	0.0293
ENSMUST00000029129	ENSMUSG00000027601	Mtfr1	1574	1.56679	2.70503	0.0391
ENSMUST00000076236	ENSMUSG00000022211	Lrrc16b	4580	3.95386	3.33343	0.0332
ENSMUST00000071230	ENSMUSG00000021116	Eif2s1	3405	17.008	19.7568	0.0279
ENSMUST00000085553	ENSMUSG00000020656	Grhl1	3464	1.60218	0.905902	0.00475
ENSMUST00000022665	ENSMUSG00000022075	Rhobtb2	5216	21.5286	24.8605	0.0324
ENSMUST00000094077	ENSMUSG00000018476	Kdm6b	6654	0.735224	1.06953	0.00025
ENSMUST00000071782	ENSMUSG00000059991	Nptx2	2536	10.4855	12.9106	0.00495
ENSMUST00000093298	ENSMUSG00000045671	Spred2	2852	14.142	18.1493	0.003
ENSMUST00000093299	ENSMUSG00000045671	Spred2	4449	2.46208	3.71303	0.00905
ENSMUST00000160780	ENSMUSG00000053004	Hrh1	2782	1.87136	4.70589	0.0005
ENSMUST00000093290	ENSMUSG00000020134	Peli1	3514	13.8003	16.2434	0.02585
ENSMUST00000151689	ENSMUSG00000031232	Magt1	4531	6.10368	7.56895	0.0079
ENSMUST00000148208	ENSMUSG00000029513	Prkab1	794	2.04933	0.553426	0.04245
ENSMUST00000174459	ENSMUSG00000090523	Gypc	2180	0.868885	0.627628	0.0434
ENSMUST00000078058	ENSMUSG00000049184	Purg	1796	12.3402	15.0402	0.0188
ENSMUST00000114144	ENSMUSG00000051243	Islr2	3880	2.40296	4.04958	0.0093
ENSMUST00000187105	ENSMUSG00000026309	Ilkap	2342	3.22127	1.80998	0.0057
ENSMUST00000043654	ENSMUSG00000045007	Tubg2	1754	12.8796	11.0087	0.04875
ENSMUST00000064495	ENSMUSG00000052566	Hook2	2617	3.84864	3.15926	0.031
ENSMUST00000111704	ENSMUSG00000030259	Rassf8	5446	2.49088	3.20405	0.00835
ENSMUST00000115222	ENSMUSG00000047412	Zbtb44	8857	8.29702	9.67496	0.0283
ENSMUST00000070125	ENSMUSG00000021919	Chat	2810	1.97869	1.51611	0.0232
ENSMUST00000174282	ENSMUSG00000032423	Syncrip	3404	5.56107	8.91662	0.03525
ENSMUST00000029907	ENSMUSG00000028243	Ubxn2b	6642	10.2929	12.3554	0.0068
ENSMUST00000078694	ENSMUSG00000061718	Ppp1r1b	2001	53.9771	41.8526	0.0066
ENSMUST00000027768	ENSMUSG00000026491	Ahctf1	8506	13.412	15.5639	0.02965
ENSMUST00000192874	ENSMUSG00000037447	Arid5a	5014	0.435478	0.265155	0.0224
ENSMUST00000024839	ENSMUSG00000024042	Sik1	4511	3.38768	4.36934	0.0019
ENSMUST00000025835	ENSMUSG00000024900	Cpt1a	4300	5.34097	4.37851	0.0112
ENSMUST00000034713	ENSMUSG00000032193	Ldlr	4531	4.97752	3.58401	5e-05
ENSMUST00000197188	ENSMUSG00000029501	Ankle2	4077	6.69128	8.57592	0.03745
ENSMUST00000022287	ENSMUSG00000021765	Fst	2337	1.10844	1.52233	0.01275
ENSMUST00000102886	ENSMUSG00000009614	Sardh	4521	2.30082	1.88174	0.03555
ENSMUST00000069992	ENSMUSG00000056089	Gm5468	653	1.41798	0.742339	0.02815
ENSMUST00000103055	ENSMUSG00000038914	Dido1	4613	8.34921	6.38474	0.0479
ENSMUST00000034015	ENSMUSG00000031604	Msmo1	2044	41.7074	49.0088	0.02435
ENSMUST00000089257	ENSMUSG00000068154	Insm1	3100	1.84403	2.38484	0.0096
ENSMUST00000112601	ENSMUSG00000026836	Acvr1	3050	3.18476	4.87092	0.0009
ENSMUST00000027697	ENSMUSG00000026437	Cdk18	4355	3.33686	2.66687	0.02415
ENSMUST00000068916	ENSMUSG00000031570	Ppapdc1b	1456	2.54464	1.08147	0.00095
ENSMUST00000076894	ENSMUSG00000040782	Rfwd2	5116	12.619	15.3791	0.0183
ENSMUST00000049507	ENSMUSG00000044254	Pcsk9	3521	0.683942	0.31369	5e-05
ENSMUST00000044567	ENSMUSG00000036632	Alg5	1471	11.1807	9.20572	0.031
ENSMUST00000202447	ENSMUSG00000032898	Fbxo21	3959	14.6989	11.411	0.03175
ENSMUST00000020629	ENSMUSG00000020363	Gfpt2	2947	2.58714	1.7063	5e-05
ENSMUST00000115038	ENSMUSG00000032128	Robo3	4714	1.36638	0.871215	0.001
ENSMUST00000060009	ENSMUSG00000048647	Exd1	6042	0.508344	0.3312	0.0495
ENSMUST00000063694	ENSMUSG00000052040	Klf13	6396	19.0443	22.0746	0.02505
ENSMUST00000132661	ENSMUSG00000050423	Ppp1r3g	2361	1.83713	2.30729	0.0352
ENSMUST00000170086	ENSMUSG00000037321	Tap1	2953	0.95919	0.563961	0.0029
ENSMUST00000051169	ENSMUSG00000039990	Edrf1	5424	1.91551	3.01823	0.01295
ENSMUST00000023400	ENSMUSG00000022715	Tmem114	1406	0.494695	0.237016	0.0162
ENSMUST00000048121	ENSMUSG00000041794	Myrip	4906	18.5394	21.601	0.0223
ENSMUST00000023151	ENSMUSG00000022508	Bcl6	3525	4.13025	5.78767	5e-05
ENSMUST00000107361	ENSMUSG00000035355	Kcnh4	3748	1.98168	1.37717	0.0225
ENSMUST00000034973	ENSMUSG00000032402	Smad3	5090	16.7641	20.0916	0.00715
ENSMUST00000040735	ENSMUSG00000036820	Amdhd2	1496	4.20773	3.15843	0.0294
ENSMUST00000020755	ENSMUSG00000020463	Smek2	5125	19.4615	22.6415	0.0278
ENSMUST00000045540	ENSMUSG00000038485	Socs7	7015	22.9286	27.0879	0.0111
ENSMUST00000117095	ENSMUSG00000003363	Pld3	2282	182.956	160.659	0.04545
ENSMUST00000041643	ENSMUSG00000039849	Pcif1	5772	7.85242	6.56854	0.04335
ENSMUST00000051301	ENSMUSG00000043991	Pura	14943	36.2952	42.5651	0.01475
ENSMUST00000030651	ENSMUSG00000028843	Sh3bgrl3	743	69.3466	59.0789	0.04335
ENSMUST00000060642	ENSMUSG00000036273	Lrrk2	8275	16.8923	21.4184	0.0005
ENSMUST00000106188	ENSMUSG00000025137	Pcyt2	1486	4.32378	6.48262	0.0442
ENSMUST00000037374	ENSMUSG00000032750	Gab3	2153	0.986743	0.635631	0.00975
ENSMUST00000037370	ENSMUSG00000029093	Sorcs2	5707	7.97108	6.57942	0.00875
ENSMUST00000107696	ENSMUSG00000039634	Zfp189	2965	5.01879	6.90727	0.0001
ENSMUST00000093110	ENSMUSG00000029659	Medag	2953	7.77043	9.77854	0.01015
ENSMUST00000093113	ENSMUSG00000053399	Adamts18	5642	0.557321	0.423952	0.03385
ENSMUST00000163252	ENSMUSG00000026659	Dusp12	1811	2.54081	1.55411	0.0367
ENSMUST00000015622	ENSMUSG00000015478	Rnf5	1238	14.0571	10.7693	0.0043
ENSMUST00000190196	ENSMUSG00000073600	Prob1	4888	1.13086	0.849983	0.00665
ENSMUST00000040428	ENSMUSG00000093989	Rnasek	611	99.4136	80.8488	0.01265
ENSMUST00000027231	ENSMUSG00000026062	Slc9a2	5019	1.67645	1.34528	0.02025
ENSMUST00000065856	ENSMUSG00000053414	Hunk	5009	3.32416	2.42823	0.0003
ENSMUST00000050148	ENSMUSG00000024780	Cdc37l1	2517	31.1182	35.544	0.0465
ENSMUST00000061512	ENSMUSG00000051590	Map3k19	3967	1.46173	2.00257	0.03425
ENSMUST00000105778	ENSMUSG00000057637	Prdm2	7304	7.11921	8.5453	0.0089
ENSMUST00000021803	ENSMUSG00000021374	Nup153	6109	12.0287	14.4304	0.0079
ENSMUST00000199808	ENSMUSG00000038095	Sbno1	10161	17.4995	20.843	0.0385
ENSMUST00000108243	ENSMUSG00000027665	Pik3ca	6689	19.1597	22.7472	0.01765
ENSMUST00000098966	ENSMUSG00000074497	A430078G23Rik	2963	0.689961	0.511647	0.04965
ENSMUST00000036155	ENSMUSG00000035211	Xrra1	2631	0.462292	0.304311	0.033
ENSMUST00000059588	ENSMUSG00000048371	Pdp2	3485	4.168	3.4158	0.01825
ENSMUST00000057652	ENSMUSG00000058402	Zfp420	2744	0.530303	2.04945	0.01185
ENSMUST00000039026	ENSMUSG00000037010	Apln	3149	5.56928	6.54379	0.0412
ENSMUST00000165953	ENSMUSG00000024369	Nelfe	1381	8.66919	6.83173	0.0417
ENSMUST00000164843	ENSMUSG00000024942	Capn1	3048	4.40824	3.56049	0.03385
ENSMUST00000059580	ENSMUSG00000049327	Setd8	2739	5.24811	7.59217	0.0008
ENSMUST00000020375	ENSMUSG00000064181	Rab3ip	2690	10.1527	12.4094	0.00665
ENSMUST00000028403	ENSMUSG00000027015	Cybrd1	5339	0.886109	0.694289	0.0292
ENSMUST00000021719	ENSMUSG00000021290	2010107E04Rik	365	1478.9	1704.12	0.031
ENSMUST00000114548	ENSMUSG00000032076	Cadm1	4482	32.9775	41.1183	0.01875
ENSMUST00000138786	ENSMUSG00000068205	Macrod2	4152	11.5751	8.8253	0.04065
ENSMUST00000033671	ENSMUSG00000031309	Rps6ka3	7244	9.40945	12.1351	0.00025
ENSMUST00000001480	ENSMUSG00000001441	Npepps	4215	23.3229	27.8827	0.02235
ENSMUST00000105849	ENSMUSG00000001089	Luzp1	7438	7.7163	11.5542	0.00125
ENSMUST00000041264	ENSMUSG00000062931	Zfp938	2035	5.75632	8.19722	0.00575
ENSMUST00000066610	ENSMUSG00000048458	Fam212b	4701	16.1665	22.6249	5e-05
ENSMUST00000139582	ENSMUSG00000035713	Usp35	4262	4.78445	3.87065	0.04965
ENSMUST00000109418	ENSMUSG00000048486	Fitm2	3967	10.1443	11.6689	0.04635
ENSMUST00000004051	ENSMUSG00000003949	Hlf	5642	19.6706	23.2335	0.01425
ENSMUST00000077376	ENSMUSG00000047635	2810006K23Rik	1677	5.10344	6.25456	0.03035
ENSMUST00000105999	ENSMUSG00000028776	Tinagl1	1952	1.61746	2.23216	0.015
ENSMUST00000117557	ENSMUSG00000015656	Hspa8	2019	428.359	563.28	0.0004
ENSMUST00000021620	ENSMUSG00000021203	Otub2	2791	9.63027	13.0021	0.0006
ENSMUST00000019994	ENSMUSG00000019848	Popdc3	1853	0.314743	0.576597	0.03705
ENSMUST00000019992	ENSMUSG00000019846	Lama4	6046	2.24882	1.87801	0.03935
ENSMUST00000159879	ENSMUSG00000018199	Trove2	8738	19.8348	23.135	0.022
ENSMUST00000009789	ENSMUSG00000019916	P4ha1	4043	4.59407	7.1074	0.00175
ENSMUST00000181981	ENSMUSG00000045659	Plekha7	4633	1.28177	0.818929	0.0282
ENSMUST00000160456	ENSMUSG00000038473	Nos1ap	3022	6.33488	8.03722	0.03645
ENSMUST00000038863	ENSMUSG00000035202	Lars2	3881	160.822	191.142	0.00875
ENSMUST00000110042	ENSMUSG00000051107	Gm15440	1231	5.63104	7.03848	0.0224
ENSMUST00000134936	ENSMUSG00000009995	Taz	1078	2.78638	0.866146	0.0408
ENSMUST00000206720	ENSMUSG00000034342	Cbl	11372	4.67717	6.63121	5e-05
ENSMUST00000092155	ENSMUSG00000027966	Col11a1	7667	1.46858	1.01816	0.0001
ENSMUST00000053663	ENSMUSG00000038299	Wdr36	3281	7.04477	8.95888	0.02585
ENSMUST00000053661	ENSMUSG00000047867	Gimap6	1594	2.1176	3.02652	0.00455
ENSMUST00000183125	ENSMUSG00000042063	Zfp386	4779	6.60714	5.26037	0.01695
ENSMUST00000117399	ENSMUSG00000031207	Msn	3842	2.62692	2.04831	0.00715
ENSMUST00000028241	ENSMUSG00000026880	Stom	2787	2.92363	2.01639	0.0004
ENSMUST00000190422	ENSMUSG00000101523	Gm10031	2653	0.29735	0.496325	0.00945
ENSMUST00000114779	ENSMUSG00000029911	Ssbp1	4398	1.15814	0.821243	0.04595
ENSMUST00000065134	ENSMUSG00000089762	Ier5l	2683	6.58874	8.27283	0.0041
ENSMUST00000018971	ENSMUSG00000053046	Brsk2	4049	9.34601	13.4574	0.00985
ENSMUST00000138762	ENSMUSG00000033671	Cep350	13307	6.40986	7.48294	0.0319
ENSMUST00000096250	ENSMUSG00000033237	Arid2	8507	5.95713	7.09186	0.01295
ENSMUST00000105682	ENSMUSG00000039852	Rere	7728	11.949	14.1241	0.01385
ENSMUST00000042065	ENSMUSG00000033618	Map3k13	6709	3.64275	5.28666	5e-05
ENSMUST00000140485	ENSMUSG00000026014	Raph1	10024	5.29634	7.33784	0.0001
ENSMUST00000003640	ENSMUSG00000003545	Fosb	3751	1.34185	1.95699	0.00015
ENSMUST00000095446	ENSMUSG00000043822	Adamtsl5	1957	0.404484	0.100428	0.04235
ENSMUST00000149369	ENSMUSG00000039671	Zmynd8	990	4.11633	7.86715	0.0416
ENSMUST00000071792	ENSMUSG00000063236	1110038F14Rik	1010	15.3241	12.7075	0.02995
ENSMUST00000110262	ENSMUSG00000079043	Fastkd5	3015	3.58406	4.74377	0.0147
ENSMUST00000111398	ENSMUSG00000029478	Ncor2	8808	1.15485	1.84664	0.03285
ENSMUST00000084968	ENSMUSG00000037896	Rcor1	5684	3.58288	4.47593	0.01195
ENSMUST00000031355	ENSMUSG00000029407	Uso1	3898	13.7941	16.1572	0.03455
ENSMUST00000042710	ENSMUSG00000038059	Smim3	1984	1.75647	2.63922	0.00085
ENSMUST00000074792	ENSMUSG00000059183	Mtfmt	2042	4.08098	5.14587	0.01635
ENSMUST00000025010	ENSMUSG00000024180	Tmem8	3464	2.60311	1.99814	0.00475
ENSMUST00000055077	ENSMUSG00000047986	Palm3	2452	0.874615	0.623021	0.0467
ENSMUST00000200575	ENSMUSG00000058153	Sez6l	4998	2.23689	3.70882	0.04525
ENSMUST00000115557	ENSMUSG00000058192	Zfp846	2757	4.06798	5.50794	0.0011
ENSMUST00000016696	ENSMUSG00000016552	Foxred2	4793	4.3938	3.56208	0.02195
ENSMUST00000169652	ENSMUSG00000049625	Tifab	3498	0.571359	0.384894	0.0145
ENSMUST00000038287	ENSMUSG00000034765	Dusp5	2473	2.38679	3.41594	0.00055
ENSMUST00000126435	ENSMUSG00000004996	Mri1	2819	2.60754	1.79454	0.0017
ENSMUST00000097291	ENSMUSG00000052105	Mtcl1	7274	7.25705	8.89194	0.0341
ENSMUST00000043531	ENSMUSG00000038604	Fam65a	4109	6.10252	8.13232	0.0324
ENSMUST00000114159	ENSMUSG00000026932	Nacc2	6675	9.88856	7.51438	0.013
ENSMUST00000031288	ENSMUSG00000029345	Tfip11	3560	11.3104	9.52143	0.0355
ENSMUST00000141755	ENSMUSG00000010554	Mettl16	12584	2.70442	3.35294	0.0102
ENSMUST00000018716	ENSMUSG00000018572	Phf23	2006	12.6147	16.2786	0.01295
ENSMUST00000018990	ENSMUSG00000018846	Pank3	7376	20.4796	25.0958	0.00275
ENSMUST00000160424	ENSMUSG00000022416	Cacna1i	9781	8.11594	9.76214	0.0063
ENSMUST00000146903	ENSMUSG00000023118	Sympk	4781	5.25916	3.79437	0.0439
ENSMUST00000102656	ENSMUSG00000052135	Foxo6	2615	2.09215	2.76675	0.0061
ENSMUST00000178174	ENSMUSG00000095139	Pou3f2	5587	8.76038	10.1301	0.03925
ENSMUST00000111738	ENSMUSG00000038593	Tctn1	5717	3.32739	2.7812	0.04185
ENSMUST00000000219	ENSMUSG00000000214	Th	1829	2.58686	2.02017	0.0389
ENSMUST00000112121	ENSMUSG00000048578	Mlec	5955	21.9694	27.2992	0.0013
ENSMUST00000063854	ENSMUSG00000052144	Ppp4r2	4874	24.7748	29.2422	0.0155
ENSMUST00000026170	ENSMUSG00000025171	Ubtd1	1527	3.81553	4.76548	0.02865
ENSMUST00000000500	ENSMUSG00000000489	Pdgfb	2918	4.48527	5.48605	0.0146
ENSMUST00000037879	ENSMUSG00000039879	Heca	3667	11.728	14.1712	0.0075
ENSMUST00000026917	ENSMUSG00000025810	Nrp1	5907	9.4471	11.034	0.0224
ENSMUST00000030408	ENSMUSG00000028655	Mfsd2a	2151	6.4272	8.64983	0.00035
ENSMUST00000069184	ENSMUSG00000036062	Phf24	6392	2.08264	4.20611	0.0417
ENSMUST00000160681	ENSMUSG00000020246	Hcfc2	2887	8.20031	11.004	0.00725
ENSMUST00000029806	ENSMUSG00000028159	Dapp1	3083	1.30282	1.90085	0.00095
ENSMUST00000018361	ENSMUSG00000018217	Pmp22	1800	9.18169	7.69844	0.0471
ENSMUST00000108923	ENSMUSG00000078861	Zfp931	1372	15.1822	18.8418	0.01045
ENSMUST00000147165	ENSMUSG00000028653	Trit1	1964	3.22542	1.88693	0.0126
ENSMUST00000030398	ENSMUSG00000028645	Slc2a1	3260	17.3081	20.8841	0.00775
ENSMUST00000030399	ENSMUSG00000028646	Rragc	2593	21.7425	24.9999	0.0493
ENSMUST00000037491	ENSMUSG00000039109	F13a1	3877	1.07446	1.38291	0.01945
ENSMUST00000015987	ENSMUSG00000015843	Rxrg	2110	8.29806	6.95652	0.0362
ENSMUST00000107117	ENSMUSG00000020923	Ubtf	3258	8.16358	5.41648	0.04565
ENSMUST00000160759	ENSMUSG00000026709	Dars2	2838	0.250433	0.592426	0.0288
ENSMUST00000048289	ENSMUSG00000037868	Egr2	2965	3.00579	4.00503	0.0021
ENSMUST00000065040	ENSMUSG00000052921	Arhgef15	4123	1.99187	1.32767	0.03305
ENSMUST00000111817	ENSMUSG00000062014	Gmfb	4171	66.781	77.5248	0.02005
ENSMUST00000114975	ENSMUSG00000028944	Prkag2	2205	12.568	16.4406	0.00565
ENSMUST00000169862	ENSMUSG00000054321	Taf4b	5149	2.51937	2.02965	0.0105
ENSMUST00000062254	ENSMUSG00000045930	Clec14a	4539	2.05828	1.70615	0.03945
ENSMUST00000034964	ENSMUSG00000032397	Tipin	1211	17.2721	13.1252	0.00115
ENSMUST00000010550	ENSMUSG00000010406	Mrpl52	418	97.803	82.1989	0.04705
ENSMUST00000124763	ENSMUSG00000032589	Bsn	7496	3.61352	5.69818	0.03315
ENSMUST00000034564	ENSMUSG00000032062	2310030G06Rik	1242	1.81668	1.23354	0.0163
ENSMUST00000041892	ENSMUSG00000037890	Wdr19	4401	3.13075	2.31752	0.04545
ENSMUST00000082418	ENSMUSG00000064367	mt-Nd5	1824	357.897	306.855	0.04815
ENSMUST00000134794	ENSMUSG00000026730	Pter	3571	31.2946	35.7069	0.04955
ENSMUST00000118593	ENSMUSG00000014599	Csf1	3058	0.524246	0.234625	0.0402
ENSMUST00000023099	ENSMUSG00000022462	Slc38a2	4626	30.4326	38.6757	0.00045
ENSMUST00000146760	ENSMUSG00000089989	Flt3l	1075	0.911394	0.446489	0.00795
ENSMUST00000040381	ENSMUSG00000039804	Ncoa5	3179	6.37906	8.01835	0.0369
ENSMUST00000015612	ENSMUSG00000015468	Notch4	6591	0.478717	0.661306	0.0089
ENSMUST00000030865	ENSMUSG00000029007	Agtrap	3996	1.8559	1.4725	0.02145
ENSMUST00000030868	ENSMUSG00000040254	Sema3d	6307	1.98752	2.34964	0.04995
ENSMUST00000113383	ENSMUSG00000047787	Flrt1	5859	4.9418	6.25776	0.00205
ENSMUST00000046717	ENSMUSG00000033943	Mga	11982	10.3297	12.083	0.0478
ENSMUST00000120005	ENSMUSG00000062044	Lmtk3	4997	5.2165	2.25447	5e-05
ENSMUST00000041477	ENSMUSG00000037206	Islr	2226	1.79854	0.589627	0.00185
ENSMUST00000018383	ENSMUSG00000018239	Zcchc10	1267	2.1165	2.74621	0.047
ENSMUST00000171109	ENSMUSG00000040957	Cables1	3391	2.10765	4.2375	0.0016
ENSMUST00000076840	ENSMUSG00000048915	Efna5	4032	4.93554	6.53697	0.00045
ENSMUST00000074941	ENSMUSG00000063281	Zfp35	3040	7.80495	9.11468	0.04275
ENSMUST00000059598	ENSMUSG00000042857	Gm9776	2980	0.990505	0.619536	0.00115
ENSMUST00000107973	ENSMUSG00000036052	Dnajb5	2300	18.9447	26.1909	0.0004
ENSMUST00000107972	ENSMUSG00000056592	Zfp658	3495	1.92241	2.36396	0.047
ENSMUST00000062672	ENSMUSG00000049950	Rpp38	1042	8.8522	7.19785	0.035
ENSMUST00000084828	ENSMUSG00000042029	Ncapg2	6604	1.18647	1.66412	0.0001
ENSMUST00000043577	ENSMUSG00000041378	Cldn5	1414	27.8088	34.8745	0.0019
ENSMUST00000028430	ENSMUSG00000056436	Cyct	655	0.343997	0.895563	0.04175
ENSMUST00000021707	ENSMUSG00000021278	Amn	1685	2.80367	2.06404	0.0103
ENSMUST00000159062	ENSMUSG00000047013	Fbxo41	6505	2.94405	1.663	0.01775
ENSMUST00000057798	ENSMUSG00000004931	Apba3	2106	5.90204	7.08385	0.03455
ENSMUST00000047531	ENSMUSG00000039958	Mettl20	1562	1.8033	0.952731	0.02335
ENSMUST00000059579	ENSMUSG00000037808	Fam76b	3702	5.9144	4.45805	0.0141
ENSMUST00000057023	ENSMUSG00000051048	P4ha3	2361	0.782872	0.45604	0.0421
ENSMUST00000100802	ENSMUSG00000037857	Nufip2	5158	18.2229	22.9009	0.0044
ENSMUST00000032715	ENSMUSG00000030505	Prmt3	2507	12.2007	14.1337	0.0492
ENSMUST00000097739	ENSMUSG00000073678	Pgap1	10583	10.2157	11.7493	0.04635
ENSMUST00000042477	ENSMUSG00000078656	Vps25	1106	24.556	18.86	0.00905
ENSMUST00000109401	ENSMUSG00000009470	Tnpo1	8453	16.1649	18.9008	0.0314
ENSMUST00000020145	ENSMUSG00000019970	Sgk1	2456	21.9871	26.657	0.04185
ENSMUST00000059680	ENSMUSG00000022200	Golph3	2606	40.1255	46.7925	0.0197
ENSMUST00000004681	ENSMUSG00000004565	Pnpla6	4437	3.73419	5.46926	0.0084
ENSMUST00000073080	ENSMUSG00000058927	Gm10053	949	1.05538	1.78565	0.00765
ENSMUST00000115733	ENSMUSG00000041624	Gucy1a2	5273	21.0823	26.1584	0.00065
ENSMUST00000021635	ENSMUSG00000021214	Akr1c18	1207	2.38823	3.19384	0.0313
ENSMUST00000021141	ENSMUSG00000020787	P2rx1	2486	0.453267	0.215682	0.02025
ENSMUST00000047443	ENSMUSG00000032718	Mansc1	2376	3.19127	2.44	0.00725
ENSMUST00000019967	ENSMUSG00000019823	Mical1	3563	2.34975	1.76885	0.0402
ENSMUST00000088233	ENSMUSG00000023008	Fmnl3	4423	1.85857	1.34846	0.02665
ENSMUST00000058790	ENSMUSG00000048058	Ldlrad3	3833	3.02042	2.42389	0.02295
ENSMUST00000105235	ENSMUSG00000025369	Smarcc2	4934	11.4015	8.06926	0.0427
ENSMUST00000038876	ENSMUSG00000040212	Emp3	758	3.1797	2.08753	0.01185
ENSMUST00000143842	ENSMUSG00000034621	Gpatch8	6871	8.17998	6.96944	0.03065
ENSMUST00000172455	ENSMUSG00000073423	Zfp414	889	4.09452	2.12392	0.01265
ENSMUST00000180336	ENSMUSG00000093910	Zfp853	1956	1.29971	0.932779	0.02375
ENSMUST00000024042	ENSMUSG00000023272	Creld2	1364	9.63567	15.3358	5e-05
ENSMUST00000024044	ENSMUSG00000023274	Cd4	3108	1.71473	1.21616	0.00795
ENSMUST00000052839	ENSMUSG00000031217	Efnb1	3258	3.12848	3.83475	0.02125
ENSMUST00000139774	ENSMUSG00000023206	Il15ra	1375	0.859057	0.257846	0.0339
ENSMUST00000088652	ENSMUSG00000067873	Htatsf1	2810	28.7003	24.8405	0.0427
ENSMUST00000020576	ENSMUSG00000020326	Ccng1	3512	47.774	56.4087	0.01095
ENSMUST00000062405	ENSMUSG00000049892	Rasd1	1611	2.06339	3.0192	0.00225
ENSMUST00000047196	ENSMUSG00000040557	Wbscr27	2808	1.5644	1.16403	0.02895
ENSMUST00000091146	ENSMUSG00000039844	Rapgef1	6212	3.43634	2.246	0.0368
ENSMUST00000018966	ENSMUSG00000018822	Sfrp5	1900	0.548805	0.220324	0.00115
ENSMUST00000025399	ENSMUSG00000024521	Pmaip1	2646	1.99702	2.6236	0.0073
ENSMUST00000109191	ENSMUSG00000074575	Kcng1	4089	1.70017	2.59272	0.00025
ENSMUST00000053308	ENSMUSG00000048424	Ranbp3l	3017	2.17919	1.63158	0.0052
ENSMUST00000002305	ENSMUSG00000042599	Kdm7a	9566	11.9921	17.4318	5e-05
ENSMUST00000035625	ENSMUSG00000039519	Cyp7b1	2166	8.93792	10.5074	0.0397
ENSMUST00000087950	ENSMUSG00000067578	Cbln4	2902	4.98886	6.27484	0.0054
ENSMUST00000159405	ENSMUSG00000051375	Pcdh1	3880	8.16607	11.2715	0.0209
ENSMUST00000029741	ENSMUSG00000028099	Polr3c	2390	2.76292	1.90861	0.01975
ENSMUST00000078856	ENSMUSG00000058488	Kl	5118	1.17736	1.71059	0.0001
ENSMUST00000177608	ENSMUSG00000016918	Sulf1	5598	3.11364	3.96882	0.0174
ENSMUST00000024869	ENSMUSG00000024068	Spast	4696	18.6679	21.308	0.0495
ENSMUST00000090380	ENSMUSG00000039704	Lmbrd2	3863	21.9406	25.9214	0.01865
ENSMUST00000025800	ENSMUSG00000024867	Pip5k1b	2573	4.98939	6.43353	0.00405
ENSMUST00000110492	ENSMUSG00000050271	D8Ertd82e	4780	1.9057	2.96479	5e-05
ENSMUST00000196700	ENSMUSG00000037400	Atp11b	6322	8.59958	6.23549	0.0032
ENSMUST00000161650	ENSMUSG00000053004	Hrh1	2978	2.75721	1.0713	0.0019
ENSMUST00000095263	ENSMUSG00000071074	Yipf3	2035	13.2916	11.1222	0.0496
ENSMUST00000049385	ENSMUSG00000035530	Eif1	1322	81.6359	99.9594	0.0036
ENSMUST00000002095	ENSMUSG00000002028	Kmt2a	16439	5.70249	8.3169	0.0001
ENSMUST00000078508	ENSMUSG00000060284	Sp7	2906	0.457852	0.318402	0.0487
ENSMUST00000164235	ENSMUSG00000021840	Mapk1ip1l	4516	3.13392	4.42152	0.00685
ENSMUST00000068593	ENSMUSG00000055172	C1ra	2981	0.906733	1.21018	0.02075
ENSMUST00000017597	ENSMUSG00000017453	Pipox	1998	0.944905	0.664378	0.03975
ENSMUST00000126153	ENSMUSG00000025420	Katnal2	1942	2.32698	2.98496	0.03435
ENSMUST00000133149	ENSMUSG00000018378	Cuedc1	1844	1.51353	0.935813	0.04855
ENSMUST00000025739	ENSMUSG00000024817	Uhrf2	3536	17.3381	24.0201	5e-05
ENSMUST00000166193	ENSMUSG00000051985	Igfn1	8989	2.25838	1.52953	5e-05
ENSMUST00000003433	ENSMUSG00000020190	Mknk2	3065	3.29598	4.66015	0.04795
ENSMUST00000025025	ENSMUSG00000024190	Dusp1	1990	10.8942	9.07346	0.0454
ENSMUST00000025027	ENSMUSG00000024194	Cuta	639	10.3885	17.1445	0.0066
ENSMUST00000055884	ENSMUSG00000050534	Htr5b	1935	0.473938	0.853616	0.00165
ENSMUST00000029367	ENSMUSG00000027792	Bche	6210	1.32759	0.983924	0.0025
ENSMUST00000176824	ENSMUSG00000037112	Sik2	5369	1.05829	2.3354	0.00135
ENSMUST00000160437	ENSMUSG00000029625	Cpsf4	2971	4.57226	3.11469	0.0034
ENSMUST00000112177	ENSMUSG00000006527	Sfmbt1	3299	1.6062	2.84887	0.0191
ENSMUST00000067582	ENSMUSG00000054484	Tmem62	2921	8.42341	11.2694	0.0053
ENSMUST00000081314	ENSMUSG00000030528	Blm	4598	1.44326	1.06218	0.0082
ENSMUST00000055535	ENSMUSG00000036030	Prtg	9148	0.90537	0.737448	0.0306
ENSMUST00000029964	ENSMUSG00000028289	Epha7	6746	6.16953	7.74271	0.03945
ENSMUST00000168134	ENSMUSG00000037519	Ppfia1	5181	5.8392	4.73734	0.016
ENSMUST00000058884	ENSMUSG00000022685	Parn	2902	9.9373	7.85469	0.002
ENSMUST00000089017	ENSMUSG00000033487	Fndc3a	6143	12.6586	15.2735	0.02035
ENSMUST00000059589	ENSMUSG00000043811	Rtn4r	1938	15.0887	17.7183	0.0294
ENSMUST00000081265	ENSMUSG00000057098	Ebf1	5981	1.07107	0.82672	0.04595
ENSMUST00000108007	ENSMUSG00000095193	Gm20939	1572	1.74575	2.48362	0.0058
ENSMUST00000170377	ENSMUSG00000028057	Rit1	2573	1.24735	2.44129	0.04915
ENSMUST00000075550	ENSMUSG00000045273	Cenph	1251	0.555353	0.290596	0.0315
ENSMUST00000068975	ENSMUSG00000057101	Zfp180	3901	19.4428	24.1974	0.0014
ENSMUST00000103071	ENSMUSG00000020713	Gh	862	0	3.01122	5e-05
ENSMUST00000087316	ENSMUSG00000067276	Capn6	3561	0.614267	0.395833	0.00645
ENSMUST00000087315	ENSMUSG00000007029	Vars	4137	7.46538	6.17903	0.01915
ENSMUST00000034351	ENSMUSG00000031880	Rrad	1575	1.2655	1.76742	0.0211
ENSMUST00000044509	ENSMUSG00000041096	Tspyl2	2696	32.132	27.3038	0.0309
ENSMUST00000051097	ENSMUSG00000048752	Prss50	1456	0.365538	0.707764	0.0076
ENSMUST00000029489	ENSMUSG00000027890	Gstm4	1707	3.24512	2.47485	0.0486
ENSMUST00000108268	ENSMUSG00000001123	Lgals9	1520	1.95125	1.28368	0.0134
ENSMUST00000037480	ENSMUSG00000038013	Wipf2	7011	6.76011	8.22378	0.00485
ENSMUST00000023559	ENSMUSG00000022853	Ehhadh	3018	1.70808	1.03048	5e-05
ENSMUST00000065297	ENSMUSG00000039633	Lonrf1	3930	4.46886	5.52186	0.00665
ENSMUST00000059428	ENSMUSG00000045790	Ccdc149	3295	14.4952	17.1564	0.0243
ENSMUST00000069620	ENSMUSG00000055866	Per2	5833	3.56764	7.57512	5e-05
ENSMUST00000108319	ENSMUSG00000040738	Ints8	3220	9.60049	13.5433	0.00045
ENSMUST00000112243	ENSMUSG00000042064	Myo3b	6213	0.75118	0.549105	0.00685
ENSMUST00000023171	ENSMUSG00000022528	Hes1	1468	5.07849	6.17922	0.0426
ENSMUST00000165649	ENSMUSG00000041028	Ghitm	2906	146.599	166.522	0.04765
ENSMUST00000205359	ENSMUSG00000051113	Fam71e1	1307	0.971759	0.52419	0.0348
ENSMUST00000034910	ENSMUSG00000032355	Mlip	1227	4.41378	7.37773	0.0247
ENSMUST00000040241	ENSMUSG00000033658	Ddx19b	6612	7.39004	8.99648	0.00675
ENSMUST00000020776	ENSMUSG00000020482	Ccdc117	3372	9.01846	12.0891	0.00015
ENSMUST00000014065	ENSMUSG00000013921	Clip3	3381	24.8021	31.004	0.00195
ENSMUST00000099945	ENSMUSG00000075232	Amd1	3206	52.0419	61.2605	0.01115
ENSMUST00000082407	ENSMUSG00000064356	mt-Atp8	204	26423.9	19184.9	0.0012
ENSMUST00000030894	ENSMUSG00000029028	Lrrc47	3395	7.94778	6.21981	0.0479
ENSMUST00000030675	ENSMUSG00000028861	Mrps15	937	20.5731	16.8047	0.03375
ENSMUST00000041865	ENSMUSG00000034738	Nostrin	1808	1.61994	3.65059	5e-05
ENSMUST00000163475	ENSMUSG00000091474	2610021A01Rik	4004	8.7943	10.6141	0.0119
ENSMUST00000022954	ENSMUSG00000022332	Khdrbs3	1887	107.939	125.893	0.0189
ENSMUST00000051431	ENSMUSG00000047539	Fbxo28	4925	13.939	16.7049	0.0162
ENSMUST00000113915	ENSMUSG00000043929	Klhl15	6241	7.06673	8.42172	0.0201
ENSMUST00000106781	ENSMUSG00000043572	Pars2	3046	1.80332	0.938319	5e-05
ENSMUST00000021959	ENSMUSG00000021497	Txndc15	1521	44.3049	51.8593	0.02165
ENSMUST00000046929	ENSMUSG00000063317	Usp31	10198	19.9985	23.8385	0.0061
ENSMUST00000098942	ENSMUSG00000074476	Spc24	1349	1.14082	0.708706	0.0145
ENSMUST00000076859	ENSMUSG00000028680	Plk3	2378	3.09448	4.16291	0.00495
ENSMUST00000099508	ENSMUSG00000043301	Kcnj6	3086	3.64287	5.30281	0.0259
ENSMUST00000045035	ENSMUSG00000040564	Apoc1	427	5.95717	8.74598	0.0263
ENSMUST00000014642	ENSMUSG00000014498	Ankrd52	6620	3.72766	4.81772	0.01895
ENSMUST00000028426	ENSMUSG00000027035	Cers6	7038	10.3413	12.255	0.02145
ENSMUST00000114839	ENSMUSG00000029131	Dnajb6	1605	112.845	130.353	0.0401
ENSMUST00000033123	ENSMUSG00000040136	Abcc8	4952	4.65312	3.9217	0.02815
ENSMUST00000093955	ENSMUSG00000020485	Supt4a	706	39.0638	46.0992	0.03615
ENSMUST00000199754	ENSMUSG00000042390	Gatad2b	7438	11.238	12.9446	0.04035
ENSMUST00000088827	ENSMUSG00000022610	Mapk12	1889	1.86567	1.32308	0.01425
ENSMUST00000050433	ENSMUSG00000031997	Trpc6	3029	18.7597	22.0241	0.0216
ENSMUST00000004036	ENSMUSG00000003934	Efnb3	3183	25.7228	21.4675	0.0076
ENSMUST00000070508	ENSMUSG00000041679	Lrrc29	1922	0.663654	0.272046	0.0006
ENSMUST00000120388	ENSMUSG00000024810	Il33	2537	19.3721	16.1505	0.01175
ENSMUST00000019907	ENSMUSG00000019773	Fbxo5	1940	1.01272	0.740098	0.0494
ENSMUST00000004054	ENSMUSG00000022905	Kpna1	5039	43.1905	49.5345	0.04255
ENSMUST00000183693	ENSMUSG00000027584	Oprl1	3102	6.49793	3.87033	0.0242
ENSMUST00000087543	ENSMUSG00000067370	B3galt4	1569	2.76358	2.13349	0.0329
ENSMUST00000117577	ENSMUSG00000038187	Btbd10	2384	34.1897	42.408	0.00985
ENSMUST00000039867	ENSMUSG00000033964	Zbtb41	8361	6.7516	8.0248	0.03045
ENSMUST00000038845	ENSMUSG00000040747	Cd53	1742	7.12341	8.77202	0.015
ENSMUST00000072699	ENSMUSG00000015217	Hmgb3	1571	10.4101	7.33054	0.04305
ENSMUST00000099560	ENSMUSG00000074925	Ptar1	2064	11.7539	13.7909	0.0373
ENSMUST00000058300	ENSMUSG00000030281	Il17rc	2302	0.568361	0.330871	0.03045
ENSMUST00000072695	ENSMUSG00000008305	Tle1	3644	1.05418	1.97125	0.02495
ENSMUST00000154960	ENSMUSG00000018167	Stard3	2170	1.14367	2.09297	0.01465
ENSMUST00000206092	ENSMUSG00000030606	Hapln3	3358	0.54101	0.34297	0.0183
ENSMUST00000197694	ENSMUSG00000027680	Fxr1	2129	16.1528	21.7574	0.03325
ENSMUST00000088311	ENSMUSG00000067724	Gbx1	3475	0.623657	0.43009	0.017
ENSMUST00000071804	ENSMUSG00000056383	AI987944	2671	2.9831	4.0365	0.0241
ENSMUST00000165335	ENSMUSG00000029064	Gnb1	3143	23.2231	11.4477	0.0187
ENSMUST00000075312	ENSMUSG00000061808	Ttr	1219	65.9988	226.713	5e-05
ENSMUST00000075317	ENSMUSG00000022197	Pdzd2	10756	4.69106	5.6964	0.01095
ENSMUST00000079443	ENSMUSG00000035299	Mid1	2815	0.469223	0.116033	0.0475
ENSMUST00000028280	ENSMUSG00000026837	Col5a1	8406	1.53762	1.03324	5e-05
ENSMUST00000053317	ENSMUSG00000048482	Bdnf	4266	1.32932	2.57679	0.00215
ENSMUST00000090558	ENSMUSG00000068740	Celsr2	10598	17.086	19.5236	0.0424
ENSMUST00000110066	ENSMUSG00000047415	Gpr68	3223	1.73321	3.25502	0.0086
ENSMUST00000110064	ENSMUSG00000068205	Macrod2	4883	3.37626	7.44844	0.0008
ENSMUST00000117280	ENSMUSG00000028312	Smc2	5328	0.766438	1.37557	0.00535
ENSMUST00000034881	ENSMUSG00000032330	Cox7a2	754	335.689	387.097	0.03005
ENSMUST00000079597	ENSMUSG00000064225	Paqr9	8367	11.2504	13.3041	0.01235
ENSMUST00000115616	ENSMUSG00000031167	Rbm3	1225	31.8539	22.9737	0.01845
ENSMUST00000020926	ENSMUSG00000020607	Fam84a	3379	27.6942	33.3486	0.00635
ENSMUST00000084027	ENSMUSG00000031565	Fgfr1	4988	2.21156	1.36732	0.00945
ENSMUST00000131529	ENSMUSG00000058740	Kcnt1	6639	6.20634	3.93489	0.00045
ENSMUST00000110710	ENSMUSG00000079109	Pms2	2116	1.68226	0.626741	0.0123
ENSMUST00000024811	ENSMUSG00000024014	Pim1	2638	1.80458	2.32656	0.0173
ENSMUST00000118287	ENSMUSG00000023007	Prpf40b	3129	2.36989	1.22149	0.0167
ENSMUST00000078886	ENSMUSG00000040761	Spen	12082	2.04428	3.47417	0.00015
ENSMUST00000098496	ENSMUSG00000078161	Erich3	8280	4.83262	3.64472	0.0001
ENSMUST00000042135	ENSMUSG00000004952	Rasa4	2914	1.08419	0.680385	0.0203
ENSMUST00000047275	ENSMUSG00000040605	Bace2	3736	1.25965	0.87825	0.00225
ENSMUST00000100078	ENSMUSG00000075327	Zbtb2	3227	3.21795	3.98425	0.0368
ENSMUST00000067752	ENSMUSG00000054619	Mettl7a1	1883	14.3096	17.7347	0.00405
ENSMUST00000111286	ENSMUSG00000006411	Pvrl4	3201	2.0623	1.17133	0.0001
ENSMUST00000166004	ENSMUSG00000031833	Mast3	5334	17.215	20.4859	0.0091
ENSMUST00000102780	ENSMUSG00000028527	Ak4	4186	8.18461	13.3195	0.0001
ENSMUST00000055436	ENSMUSG00000043155	Hpdl	1804	0.830091	0.409957	0.00205
ENSMUST00000071065	ENSMUSG00000056749	Nfil3	2026	4.38673	5.35154	0.02685
ENSMUST00000032796	ENSMUSG00000011427	Zfp790	4525	5.72857	6.94077	0.0236
ENSMUST00000068567	ENSMUSG00000039697	Ncoa7	5105	16.7236	19.4807	0.02345
ENSMUST00000022709	ENSMUSG00000022114	Spry2	2085	14.0016	17.2168	0.0049
ENSMUST00000114136	ENSMUSG00000036986	Pml	4343	1.66377	1.20288	0.00645
ENSMUST00000056458	ENSMUSG00000060288	Ppih	757	3.20678	5.278	0.03735
ENSMUST00000031731	ENSMUSG00000029718	Pcolce	1626	2.73807	2.10199	0.0436
ENSMUST00000039517	ENSMUSG00000036863	Syde2	5495	0.682695	0.421771	0.00695
ENSMUST00000064139	ENSMUSG00000028517	Ppap2b	3159	37.8016	31.4603	0.0047
ENSMUST00000110802	ENSMUSG00000027305	Ndufaf1	1308	7.14055	9.7115	0.01155
ENSMUST00000204564	ENSMUSG00000030309	Caprin2	6291	0.503379	0.296297	0.03935
ENSMUST00000019708	ENSMUSG00000019564	Arid3a	5361	1.10426	1.5206	0.0192
ENSMUST00000047331	ENSMUSG00000033595	Lgi3	3180	29.8347	24.9217	0.00725
ENSMUST00000108496	ENSMUSG00000001918	Slc1a5	2764	0.439559	0.0901288	0.03365
ENSMUST00000063839	ENSMUSG00000052137	Rbm12b2	3327	5.51481	7.40907	0.0036
ENSMUST00000067931	ENSMUSG00000054723	Vmac	2174	2.31767	1.27417	0.0053
ENSMUST00000022145	ENSMUSG00000021643	Serf1	601	17.7117	24.6667	0.0041
ENSMUST00000166237	ENSMUSG00000028064	Sema4a	3046	1.8287	0.734774	0.014
ENSMUST00000022148	ENSMUSG00000021646	Mccc2	2123	13.3274	10.2817	0.0007
ENSMUST00000125403	ENSMUSG00000070336	Fbxo47	863	1.23957	2.31647	0.0099
ENSMUST00000016231	ENSMUSG00000016087	Fli1	3318	2.06698	2.77848	0.0028
ENSMUST00000110934	ENSMUSG00000036968	Cnpy4	1855	7.22153	8.53374	0.0492
ENSMUST00000115195	ENSMUSG00000029014	Dnajc2	1994	2.77867	1.03815	0.01195
ENSMUST00000165420	ENSMUSG00000048911	Rnf24	5833	3.30839	5.2174	0.01485
ENSMUST00000022890	ENSMUSG00000022280	Rnf19a	4276	14.3883	18.028	0.0007
ENSMUST00000140668	ENSMUSG00000058192	Zfp846	2661	1.1236	0.535756	0.0206
ENSMUST00000068944	ENSMUSG00000050721	Plekho2	3271	4.35326	3.32454	0.00155
ENSMUST00000112874	ENSMUSG00000032475	Nck1	1513	11.5764	15.0669	0.0099
ENSMUST00000034611	ENSMUSG00000048537	Phldb1	5461	4.6144	2.51542	5e-05
ENSMUST00000051691	ENSMUSG00000025060	Slk	4239	4.342	2.24251	0.01805
ENSMUST00000084770	ENSMUSG00000055373	Fut9	12134	35.3079	42.8914	0.0024
ENSMUST00000010192	ENSMUSG00000010048	Ifrd2	2056	1.12753	2.06528	0.0062
ENSMUST00000108301	ENSMUSG00000049225	Pdp1	2635	27.7029	44.6532	0.0041
ENSMUST00000031646	ENSMUSG00000029641	Rasl11a	1126	2.02761	3.09918	0.0037
ENSMUST00000069097	ENSMUSG00000028842	Ago3	15595	4.55828	5.80519	0.00045
ENSMUST00000147545	ENSMUSG00000048701	Ccdc6	5511	9.73742	11.7826	0.00565
ENSMUST00000003912	ENSMUSG00000003814	Calr	2184	159.624	196.949	0.00085
ENSMUST00000075764	ENSMUSG00000032259	Drd2	1549	7.23894	5.64585	0.0074
ENSMUST00000055341	ENSMUSG00000051335	Gfod1	6654	17.9045	25.0531	5e-05
ENSMUST00000111835	ENSMUSG00000053205	Styx	672	7.35114	10.3382	0.00455
ENSMUST00000023165	ENSMUSG00000022521	Crebbp	10820	8.33804	9.78676	0.0337
ENSMUST00000108872	ENSMUSG00000020261	Slc36a1	5264	8.51602	10.4692	0.00305
ENSMUST00000020702	ENSMUSG00000020427	Igfbp3	2421	4.62363	5.53908	0.03775
ENSMUST00000106222	ENSMUSG00000028268	Gbp3	2629	0.7271	0.391224	0.0406
ENSMUST00000106310	ENSMUSG00000032998	Foxj3	4660	2.96952	4.52208	0.02615
ENSMUST00000027083	ENSMUSG00000025946	Pth2r	2414	0.327179	0.551473	0.00635
ENSMUST00000045827	ENSMUSG00000034617	Mtrr	3692	3.95852	4.96835	0.00455
ENSMUST00000034586	ENSMUSG00000032081	Apoc3	526	0.674326	1.5234	0.02965
ENSMUST00000082430	ENSMUSG00000018339	Gpx3	1594	3.70088	2.82443	0.0146
ENSMUST00000082432	ENSMUSG00000007682	Dio2	5813	13.0588	17.5069	5e-05
ENSMUST00000162997	ENSMUSG00000052557	Gan	13461	1.99966	2.40231	0.01715
ENSMUST00000089688	ENSMUSG00000000957	Mmp14	2596	2.89012	2.07647	0.00135
ENSMUST00000034832	ENSMUSG00000032290	Ptpn9	4054	10.4115	12.5858	0.00705
ENSMUST00000033394	ENSMUSG00000031077	Fadd	3903	0.746739	0.564953	0.0377
ENSMUST00000138005	ENSMUSG00000047084	Ngrn	1709	5.60457	3.80493	0.02625
ENSMUST00000030849	ENSMUSG00000028995	Fam126a	5659	5.67291	6.63471	0.0377
ENSMUST00000020015	ENSMUSG00000019865	Nmbr	1599	2.32079	3.12215	0.01265
ENSMUST00000020831	ENSMUSG00000020523	Fam114a2	2557	14.9183	17.3827	0.03335
ENSMUST00000050687	ENSMUSG00000034271	Jdp2	1642	1.52871	4.52478	0.0228
ENSMUST00000156024	ENSMUSG00000025870	Arl10	654	2.39972	0.000990774	0.04695
ENSMUST00000060762	ENSMUSG00000024276	Zfp397	5487	11.4881	13.6347	0.01175
ENSMUST00000030118	ENSMUSG00000028410	Dnaja1	3376	75.6034	91.9787	0.0202
ENSMUST00000107793	ENSMUSG00000020866	Cacna1g	8071	1.05198	1.84568	0.0497
ENSMUST00000205503	ENSMUSG00000004609	Cd33	5728	0.499515	0.352258	0.02425
ENSMUST00000074963	ENSMUSG00000063145	Bbs5	1468	11.1572	13.9365	0.01255
ENSMUST00000005798	ENSMUSG00000005656	Snx6	1928	22.9818	27.4616	0.0137
ENSMUST00000040506	ENSMUSG00000036501	Fam13b	3343	20.6801	25.5844	0.00125
ENSMUST00000033486	ENSMUSG00000031146	Plp2	1157	3.89322	2.36193	0.0004
ENSMUST00000021726	ENSMUSG00000011148	Adssl1	1790	7.07709	5.88741	0.0375
ENSMUST00000105032	ENSMUSG00000078235	Fam43b	2437	3.58005	4.69732	0.0095
ENSMUST00000033642	ENSMUSG00000031285	Dcx	9074	4.60821	3.8236	0.01965
ENSMUST00000050063	ENSMUSG00000044147	Arf6	3730	19.2995	22.1057	0.04595
ENSMUST00000186889	ENSMUSG00000051331	Cacna1c	13162	3.10615	3.88093	0.049
ENSMUST00000058154	ENSMUSG00000036676	Tmtc3	5993	2.77837	3.91377	0.0001
ENSMUST00000070538	ENSMUSG00000023460	Rab12	2057	43.7853	54.8251	0.0067
ENSMUST00000041459	ENSMUSG00000037190	Cyb561d2	1786	2.31991	3.14863	0.04365
ENSMUST00000172057	ENSMUSG00000026594	Ralgps2	6863	7.73265	9.35932	0.0345
ENSMUST00000059155	ENSMUSG00000045294	Insig1	2697	38.6735	32.769	0.01535
ENSMUST00000060904	ENSMUSG00000044550	Tceal3	1116	75.7615	64.6393	0.0304
ENSMUST00000053148	ENSMUSG00000029534	St7	2288	3.73557	8.90165	5e-05
ENSMUST00000095383	ENSMUSG00000060935	Tmem263	3778	17.4509	20.4845	0.0184
ENSMUST00000172278	ENSMUSG00000045613	Chrm2	5676	6.81482	7.90999	0.03875
ENSMUST00000099376	ENSMUSG00000047731	Wbp1l	3911	2.59729	3.71297	0.01
ENSMUST00000172272	ENSMUSG00000021500	Ddx46	5676	16.5223	14.1547	0.0274
ENSMUST00000100866	ENSMUSG00000069814	E130309D14Rik	4002	5.52918	6.46015	0.0438
ENSMUST00000206713	ENSMUSG00000063511	Snrnp70	4008	30.441	21.2021	0.00025
ENSMUST00000109685	ENSMUSG00000027598	Itch	5309	5.92773	9.34752	0.004
ENSMUST00000076124	ENSMUSG00000063919	Srrm4	7472	2.39714	2.88758	0.04305
ENSMUST00000048418	ENSMUSG00000040029	Ipo8	5360	15.6798	18.2118	0.0366
ENSMUST00000020238	ENSMUSG00000020048	Hsp90b1	2825	172.604	211.934	0.0017
ENSMUST00000130586	ENSMUSG00000009207	Lnp	891	5.0456	11.2835	0.0367
ENSMUST00000105365	ENSMUSG00000045193	Cirbp	1321	67.1848	42.6346	5e-05
ENSMUST00000105362	ENSMUSG00000069565	Dazap1	2081	13.4782	10.7212	0.0087
ENSMUST00000114726	ENSMUSG00000031134	Rbmx	2108	9.24926	6.54643	0.0376
ENSMUST00000188402	ENSMUSG00000026283	Ing5	4538	0.408136	0.895225	0.0498
ENSMUST00000076051	ENSMUSG00000032754	Slc8b1	2661	0.428867	0.139539	0.01425
ENSMUST00000091010	ENSMUSG00000026883	Dab2ip	6455	0.515243	1.22381	0.03045
ENSMUST00000028166	ENSMUSG00000026826	Nr4a2	3568	5.81773	8.34183	0.02325
ENSMUST00000110018	ENSMUSG00000034570	Inpp5j	2384	0.158445	1.44392	0.0319
ENSMUST00000005173	ENSMUSG00000005043	Sgsh	4357	1.69534	0.88135	0.0012
ENSMUST00000149359	ENSMUSG00000009569	Mkl2	8295	33.087	38.9124	0.01625
ENSMUST00000128523	ENSMUSG00000057672	Pkn1	3070	1.35367	0.70087	0.02165
ENSMUST00000098534	ENSMUSG00000074182	Znhit6	2339	2.91954	2.21489	0.0401
ENSMUST00000042581	ENSMUSG00000037977	6430571L13Rik	2599	2.05227	1.4619	0.00325
ENSMUST00000175820	ENSMUSG00000038884	A230050P20Rik	3210	5.44794	3.69906	0.0103
ENSMUST00000108407	ENSMUSG00000017631	Abr	4811	38.5732	54.8408	0.00015
ENSMUST00000062991	ENSMUSG00000024580	Grpel2	4030	7.07182	8.36052	0.0233
ENSMUST00000178509	ENSMUSG00000094437	Gm9830	360	2.79851	5.9544	0.01535
ENSMUST00000017288	ENSMUSG00000017144	Rnd3	2828	7.90241	10.7234	0.0001
ENSMUST00000052965	ENSMUSG00000022141	Nipbl	8815	8.63803	9.87623	0.04685
ENSMUST00000067744	ENSMUSG00000054604	Cggbp1	4425	23.2649	27.0386	0.0253
ENSMUST00000085513	ENSMUSG00000030421	Uri1	3441	13.1752	11.0911	0.0413
ENSMUST00000114032	ENSMUSG00000047766	Lrrc49	2586	9.07483	12.314	0.03985
ENSMUST00000110839	ENSMUSG00000038506	Dcun1d2	2937	1.02581	3.02709	0.02115
ENSMUST00000102930	ENSMUSG00000009079	Ewsr1	2174	29.8958	20.0333	0.0223
ENSMUST00000042365	ENSMUSG00000041297	Cdk13	7081	12.352	14.4034	0.0222
ENSMUST00000159110	ENSMUSG00000019979	Apaf1	6433	1.80037	2.66584	0.02455
ENSMUST00000118012	ENSMUSG00000078877	Gm14295	1213	31.4593	37.7303	0.0271
ENSMUST00000025751	ENSMUSG00000024831	Ighmbp2	3720	3.65566	2.73413	0.03045
ENSMUST00000159200	ENSMUSG00000079654	Prrt4	3411	0.544018	0.281209	0.00045
ENSMUST00000033501	ENSMUSG00000031161	Hdac6	4142	3.43232	2.53409	0.0403
ENSMUST00000031254	ENSMUSG00000029312	Klhl8	3193	15.062	18.1105	0.0107
ENSMUST00000094626	ENSMUSG00000047216	Cdh19	3914	3.74158	4.55804	0.0191
ENSMUST00000008462	ENSMUSG00000008318	Relt	2850	5.20578	4.24081	0.022
ENSMUST00000146956	ENSMUSG00000031112	Stk26	2605	1.47501	0.861227	0.0091
ENSMUST00000171777	ENSMUSG00000039620	6430573F11Rik	1825	0.852958	1.759	0.0136
ENSMUST00000048308	ENSMUSG00000039349	C130074G19Rik	3035	25.0592	21.8345	0.0418
ENSMUST00000044691	ENSMUSG00000042215	Bag2	1860	4.2378	5.53762	0.00455
ENSMUST00000000828	ENSMUSG00000000811	Txnrd3	2836	2.49412	1.87415	0.0046
ENSMUST00000067925	ENSMUSG00000054717	Hmgb2	2692	1.39487	1.00867	0.00965
ENSMUST00000067924	ENSMUSG00000054720	Lrrc8c	6976	2.5265	3.33745	0.00025
ENSMUST00000160583	ENSMUSG00000038538	Ubn2	14644	3.21654	4.15336	0.00385
ENSMUST00000022150	ENSMUSG00000021647	Cartpt	874	13.728	16.9826	0.0161
ENSMUST00000016088	ENSMUSG00000015944	Gatsl2	7367	11.2072	13.1826	0.01585
ENSMUST00000060225	ENSMUSG00000044317	Gpr4	2882	0.963797	0.728463	0.0385
ENSMUST00000153807	ENSMUSG00000036052	Dnajb5	666	7.94375	15.6145	0.02515
ENSMUST00000081202	ENSMUSG00000063019	Manbal	1107	15.6992	13.3287	0.0498
ENSMUST00000034111	ENSMUSG00000031684	Slc10a7	3630	1.6418	2.01906	0.03605
ENSMUST00000110909	ENSMUSG00000031511	Arhgef7	4926	11.1951	13.3684	0.0382
ENSMUST00000029838	ENSMUSG00000028187	Rpf1	1661	7.37897	9.31748	0.01335
ENSMUST00000107099	ENSMUSG00000015943	Bola1	995	0.645249	0.00018375	0.04835
ENSMUST00000089215	ENSMUSG00000030092	Cntn6	3702	2.25211	3.87807	0.0171
ENSMUST00000168578	ENSMUSG00000030431	Tmem238	1375	1.22219	0.868042	0.0496
ENSMUST00000023572	ENSMUSG00000022865	Cxadr	5734	9.14065	7.93012	0.04585
ENSMUST00000048096	ENSMUSG00000039005	Tlr4	4077	0.865999	1.12978	0.01945
ENSMUST00000043767	ENSMUSG00000038398	Upf3a	1402	18.0475	14.9171	0.01635
ENSMUST00000152796	ENSMUSG00000040025	Ythdf2	4129	11.9528	14.8638	0.01115
ENSMUST00000044455	ENSMUSG00000042197	Zfp451	11876	8.48774	10.8097	0.0008
ENSMUST00000034022	ENSMUSG00000031609	Sap30	1178	7.41683	9.49597	0.0072
ENSMUST00000034021	ENSMUSG00000031608	Galnt7	4313	2.14281	3.73342	0.00015
ENSMUST00000102752	ENSMUSG00000007617	Homer1	5713	20.0249	47.2698	5e-05
ENSMUST00000045903	ENSMUSG00000032536	Trak1	4883	21.6362	25.7284	0.0096
ENSMUST00000045902	ENSMUSG00000040170	Fmo2	4066	0.437906	0.183997	0.0061
ENSMUST00000075806	ENSMUSG00000048939	Atp13a5	4598	3.25607	2.43198	0.00145
ENSMUST00000142395	ENSMUSG00000054823	Whsc1l1	10105	4.92761	6.07918	0.0289
ENSMUST00000003907	ENSMUSG00000003809	Gcdh	2167	4.08806	6.29707	0.0011
ENSMUST00000198008	ENSMUSG00000045790	Ccdc149	2470	2.12552	0.415707	0.01245
ENSMUST00000109111	ENSMUSG00000020385	Clk4	1427	4.45699	1.46579	0.04055
ENSMUST00000161576	ENSMUSG00000031770	Herpud1	1952	24.9637	29.8104	0.02075
ENSMUST00000000001	ENSMUSG00000000001	Gnai3	3262	15.7562	18.0948	0.04605
ENSMUST00000128302	ENSMUSG00000055067	Smyd3	6871	3.82616	3.13083	0.04715
ENSMUST00000108511	ENSMUSG00000020811	Wscd1	2866	23.6722	20.4277	0.0445
ENSMUST00000051633	ENSMUSG00000047719	Ubiad1	2992	3.94597	3.14637	0.0109
ENSMUST00000202578	ENSMUSG00000026825	Dnm1	2820	82.6831	106.59	0.0418
ENSMUST00000107899	ENSMUSG00000030739	Myh14	6376	3.14984	2.58707	0.0236
ENSMUST00000044521	ENSMUSG00000037692	Ahdc1	6105	2.62574	4.3281	0.0007
ENSMUST00000106307	ENSMUSG00000028634	Hivep3	11838	1.5056	2.32689	5e-05
ENSMUST00000044524	ENSMUSG00000039168	Dap	1555	1.65043	1.16497	0.02795
ENSMUST00000161490	ENSMUSG00000029334	Prkg2	4968	3.84636	4.65475	0.02225
ENSMUST00000070181	ENSMUSG00000038855	Itpkb	6235	3.57411	3.0533	0.0487
ENSMUST00000018449	ENSMUSG00000020850	Prpf8	7442	27.7944	23.4376	0.03365
ENSMUST00000082421	ENSMUSG00000064370	mt-Cytb	1144	990.348	737.903	5e-05
ENSMUST00000033923	ENSMUSG00000031523	Dlc1	6159	3.33399	4.60098	0.0272
ENSMUST00000202417	ENSMUSG00000038784	Cnot4	3296	7.84331	10.0693	0.01405
ENSMUST00000033927	ENSMUSG00000031527	Eri1	5067	3.61098	4.54792	0.00345
ENSMUST00000027071	ENSMUSG00000025937	Lactb2	4494	5.09452	4.2959	0.02915
ENSMUST00000037134	ENSMUSG00000040424	Hipk4	2926	7.17895	5.79172	0.0087
ENSMUST00000134728	ENSMUSG00000053552	Ebf4	2835	0.441001	0.218346	0.01125
ENSMUST00000010451	ENSMUSG00000010307	Tmem86a	1791	4.86754	3.23817	5e-05
ENSMUST00000185676	ENSMUSG00000026234	Ncl	3072	17.3072	12.8995	0.03205
ENSMUST00000115267	ENSMUSG00000040003	Magi2	4478	7.05205	4.71707	0.0453
ENSMUST00000085238	ENSMUSG00000079055	Slc8a3	4927	6.1502	4.57638	0.00905
ENSMUST00000019224	ENSMUSG00000019080	Mfsd3	2169	3.05337	2.25668	0.0121
ENSMUST00000065308	ENSMUSG00000037458	Azin1	4868	23.0668	28.6697	0.0414
ENSMUST00000113599	ENSMUSG00000056492	Adgrf5	8535	3.08418	2.37509	0.001
ENSMUST00000050211	ENSMUSG00000035824	Tk2	2400	15.6291	12.8977	0.0092
ENSMUST00000036665	ENSMUSG00000027742	Cog6	3182	17.3693	20.42	0.02695
ENSMUST00000041591	ENSMUSG00000022425	Enpp2	3095	67.1842	80.8878	0.0204
ENSMUST00000117102	ENSMUSG00000081683	Fzd10	3250	0.686682	0.472639	0.01565
ENSMUST00000106052	ENSMUSG00000060314	Zfp941	3851	17.0483	13.6122	0.003
ENSMUST00000037912	ENSMUSG00000037926	Ssh2	9178	4.6026	5.94846	0.0009
ENSMUST00000041024	ENSMUSG00000038302	Lace1	2513	4.82647	6.22197	0.01925
ENSMUST00000062684	ENSMUSG00000043252	Tmem64	4670	15.2657	18.2922	0.00725
ENSMUST00000179929	ENSMUSG00000019888	Mgat4c	4272	0.428913	1.48925	0.02325
ENSMUST00000037918	ENSMUSG00000037720	Tmem33	6247	19.542	23.8295	0.04655
ENSMUST00000061427	ENSMUSG00000043635	Adamts3	3934	5.40067	3.99265	0.00075
ENSMUST00000171467	ENSMUSG00000032128	Robo3	3222	0.818254	0.483111	0.0268
ENSMUST00000050073	ENSMUSG00000028035	Dnajb4	2464	32.03	43.1865	5e-05
ENSMUST00000130772	ENSMUSG00000038685	Rtel1	1594	1.833	0.923133	0.007
ENSMUST00000065103	ENSMUSG00000052962	Mrpl35	3721	4.91007	5.92122	0.0224
ENSMUST00000036060	ENSMUSG00000042258	Isl1	2516	1.77256	2.32703	0.01775
ENSMUST00000101492	ENSMUSG00000037172	E330009J07Rik	6742	25.6566	31.3486	0.00225
ENSMUST00000013931	ENSMUSG00000013787	Ehmt2	4026	15.2187	10.9573	0.0187
ENSMUST00000022682	ENSMUSG00000022091	Sorbs3	2914	2.04467	1.33712	0.0012
ENSMUST00000130379	ENSMUSG00000005371	Fbxo11	3753	18.1119	23.9925	0.01115
ENSMUST00000001046	ENSMUSG00000001020	S100a4	498	20.689	7.79174	5e-05
ENSMUST00000167107	ENSMUSG00000055240	Zfp101	2735	10.144	12.3878	0.0088
ENSMUST00000120346	ENSMUSG00000052712	BC004004	1297	7.97863	12.0647	0.03925
ENSMUST00000145304	ENSMUSG00000037139	Myom3	2551	1.34671	0.961126	0.0094
ENSMUST00000099494	ENSMUSG00000040565	Btaf1	7204	12.9481	16.1241	0.0012
ENSMUST00000051011	ENSMUSG00000047090	Tmem198b	2335	1.76568	1.1893	0.0079
ENSMUST00000099492	ENSMUSG00000035621	Midn	3597	4.44849	6.63658	5e-05
ENSMUST00000093976	ENSMUSG00000046561	Arsj	3859	1.25045	1.64866	0.00765
ENSMUST00000143813	ENSMUSG00000043644	0610009L18Rik	619	5.47725	3.46847	0.00405
ENSMUST00000099546	ENSMUSG00000074916	Chst14	2090	0.776479	0.501826	0.0124
ENSMUST00000020220	ENSMUSG00000020032	Nuak1	5558	17.813	22.9543	5e-05
ENSMUST00000039991	ENSMUSG00000037344	Slc12a9	3330	5.67528	4.61103	0.01255
ENSMUST00000039990	ENSMUSG00000038168	P3h2	3283	0.689981	0.501877	0.04425
ENSMUST00000020227	ENSMUSG00000020038	Cry1	3014	8.04081	10.6039	0.00015
ENSMUST00000032508	ENSMUSG00000030357	Fkbp4	2217	59.9654	68.4446	0.048
ENSMUST00000182659	ENSMUSG00000032580	Rbm5	3205	20.7697	30.3047	0.0014
ENSMUST00000195855	ENSMUSG00000040374	Pex2	1587	7.80369	5.67626	0.04165
ENSMUST00000109650	ENSMUSG00000020173	Cobl	5271	0.795512	1.87617	0.0247
ENSMUST00000092627	ENSMUSG00000004360	9330159F19Rik	5644	15.2447	19.9652	5e-05
ENSMUST00000092623	ENSMUSG00000019880	Rspo3	2394	6.7823	7.97301	0.04375
ENSMUST00000092020	ENSMUSG00000069439	Gm8444	357	0.579966	0	0.0151
ENSMUST00000110009	ENSMUSG00000022602	Arc	3054	16.8567	24.9663	0.0021
ENSMUST00000053792	ENSMUSG00000045008	9030612E09Rik	1859	0.816859	0.517448	0.01355
ENSMUST00000125839	ENSMUSG00000030555	Ttc23	436	1.64437	3.73305	0.04635
ENSMUST00000129820	ENSMUSG00000044847	Lsm11	6453	6.06523	7.48929	0.00255
ENSMUST00000039191	ENSMUSG00000041707	1810011H11Rik	1473	0.221971	0.473483	0.01325
ENSMUST00000159692	ENSMUSG00000046324	Ermp1	7058	2.93288	2.00775	0.02375
ENSMUST00000114020	ENSMUSG00000052406	Rexo4	2278	15.6453	19.2931	0.0065
ENSMUST00000105571	ENSMUSG00000078485	Plekhn1	2210	0.773679	0.517337	0.02095
ENSMUST00000057859	ENSMUSG00000048285	Frmd6	4660	8.86354	13.5255	5e-05
ENSMUST00000115513	ENSMUSG00000040363	Bcor	6941	1.69537	2.53905	0.02755
ENSMUST00000038131	ENSMUSG00000033970	Rfc3	1317	5.3758	3.96689	0.0108
ENSMUST00000061882	ENSMUSG00000048755	Mcat	1893	11.1723	9.24979	0.0171
ENSMUST00000108873	ENSMUSG00000027574	Nkain4	865	5.13381	8.21362	0.0153
ENSMUST00000091227	ENSMUSG00000058400	Qrfpr	1839	1.11011	1.54465	0.02925
ENSMUST00000028398	ENSMUSG00000027011	Ube2e3	2249	32.0665	37.5449	0.0488
ENSMUST00000052514	ENSMUSG00000047789	Slc38a9	8904	3.88967	4.58687	0.0248
ENSMUST00000025522	ENSMUSG00000024620	Pdgfrb	5407	3.25289	2.50028	0.0012
ENSMUST00000025295	ENSMUSG00000024427	Spry4	4587	1.16639	2.21621	5e-05
ENSMUST00000078953	ENSMUSG00000015377	Dennd6b	4607	9.61514	7.30756	0.0001
ENSMUST00000003203	ENSMUSG00000003119	Cdk12	4837	2.76093	1.86832	0.0281
ENSMUST00000052174	ENSMUSG00000045625	Pigz	2184	2.72315	1.99547	0.0132
ENSMUST00000183307	ENSMUSG00000032580	Rbm5	6321	14.0357	10.8683	0.0275
ENSMUST00000046303	ENSMUSG00000032652	Crebl2	3629	18.7699	22.0857	0.0196
ENSMUST00000106843	ENSMUSG00000078619	Smarcd2	2548	0.660688	1.33477	0.0053
ENSMUST00000042118	ENSMUSG00000038415	Foxq1	2653	1.18151	0.835675	0.0129
ENSMUST00000090287	ENSMUSG00000018830	Myh11	6632	1.97383	1.64878	0.03205
ENSMUST00000102926	ENSMUSG00000028333	Anp32b	1716	7.988	5.73592	0.00015
ENSMUST00000149658	ENSMUSG00000031256	Cstf2	7514	2.11533	1.28621	0.0234
ENSMUST00000159742	ENSMUSG00000033400	Agl	4344	1.11885	0.536985	0.0435
ENSMUST00000028004	ENSMUSG00000026687	Aldh9a1	2835	5.95613	4.96195	0.02395
ENSMUST00000117646	ENSMUSG00000032064	Dixdc1	5719	6.38675	8.72295	0.0386
ENSMUST00000029025	ENSMUSG00000027520	Zdbf2	12112	3.35072	5.12031	5e-05
ENSMUST00000186156	ENSMUSG00000033722	BC034090	4873	0.945453	0.565382	0.00555
ENSMUST00000162159	ENSMUSG00000021090	Lrrc9	4739	0.697452	0.443972	0.0388
ENSMUST00000114113	ENSMUSG00000029127	Zbtb49	2645	1.44545	0.937696	0.02035
ENSMUST00000018993	ENSMUSG00000018849	Wwc1	4531	11.7673	13.7396	0.02635
ENSMUST00000031243	ENSMUSG00000029304	Spp1	1410	5.28028	6.71244	0.031
ENSMUST00000123082	ENSMUSG00000060771	Tsga10	3953	2.29234	3.09802	0.0205
ENSMUST00000065648	ENSMUSG00000050565	Tor1aip2	2529	11.3604	14.6646	0.03325
ENSMUST00000111171	ENSMUSG00000053293	Pom121	5580	4.09339	5.18791	0.00475
ENSMUST00000094632	ENSMUSG00000070699	Sars2	1910	3.67957	2.82315	0.00925
ENSMUST00000133064	ENSMUSG00000073599	Ecscr	1055	2.45751	1.65651	0.0109
ENSMUST00000030443	ENSMUSG00000028681	Ptch2	4382	0.476432	0.293228	0.00485
ENSMUST00000042970	ENSMUSG00000041695	Kcnj2	5444	9.67592	8.17357	0.01685
ENSMUST00000016383	ENSMUSG00000016239	Lonrf3	2911	4.79439	6.05514	0.00615
ENSMUST00000089049	ENSMUSG00000045211	Nudt18	3716	3.39407	2.76481	0.0186
ENSMUST00000029447	ENSMUSG00000027854	Sike1	7375	4.11529	5.419	0.00075
ENSMUST00000054908	ENSMUSG00000022024	Sugt1	1951	39.466	45.643	0.0311
ENSMUST00000108075	ENSMUSG00000000804	Usp32	7053	36.178	41.5409	0.0329
ENSMUST00000060214	ENSMUSG00000050854	Tmem125	1864	2.73935	1.71869	0.00025
ENSMUST00000033805	ENSMUSG00000031429	Psmd10	1430	8.2906	10.5639	0.02445
ENSMUST00000029848	ENSMUSG00000028197	Col24a1	7143	0.820868	0.597841	0.00285
ENSMUST00000029846	ENSMUSG00000028195	Cyr61	2019	3.8875	2.24778	5e-05
ENSMUST00000087328	ENSMUSG00000091971	Hspa1a	2967	2.45675	3.63064	5e-05
ENSMUST00000087321	ENSMUSG00000067279	Ppp1r3c	2719	24.0217	29.9025	0.0012
ENSMUST00000201621	ENSMUSG00000029162	Khk	1583	3.1231	2.14865	0.0204
ENSMUST00000064667	ENSMUSG00000052681	Rap1b	2024	23.8451	29.9694	0.0014
ENSMUST00000065796	ENSMUSG00000024789	Jak2	5030	14.1212	17.8925	0.00055
ENSMUST00000126299	ENSMUSG00000020918	Kat2a	3269	1.08285	0.494372	0.0392
ENSMUST00000084593	ENSMUSG00000066178	6030445D17Rik	1728	0.473906	0.277408	0.0302
ENSMUST00000170036	ENSMUSG00000003382	Etv3	5127	2.87314	4.61752	0.0222
ENSMUST00000031668	ENSMUSG00000029661	Col1a2	5348	3.46376	2.74721	0.00645
ENSMUST00000128353	ENSMUSG00000037904	Ankrd9	2577	0.957546	1.45565	0.01745
ENSMUST00000022986	ENSMUSG00000022358	Fbxo32	6936	6.2203	5.10313	0.00895
ENSMUST00000114935	ENSMUSG00000024194	Cuta	597	22.8226	15.4581	0.01015
ENSMUST00000037218	ENSMUSG00000034209	Rasl10a	1110	17.1436	22.9134	0.0131
ENSMUST00000123756	ENSMUSG00000022948	Setd4	2408	1.14454	0.806006	0.04315
ENSMUST00000113853	ENSMUSG00000026806	Ddx31	3271	2.03881	2.54812	0.02605
ENSMUST00000020922	ENSMUSG00000020601	Trib2	4198	13.7091	21.1857	5e-05
ENSMUST00000020920	ENSMUSG00000020599	Rgs9	2434	26.9772	21.4828	0.00495
ENSMUST00000178925	ENSMUSG00000028282	Casp8ap2	6557	6.29328	7.76783	0.00525
ENSMUST00000182660	ENSMUSG00000040225	Prrc2c	11502	8.06122	11.335	0.0033
ENSMUST00000146722	ENSMUSG00000049659	Aftph	3763	18.1908	22.5569	0.0463
ENSMUST00000112188	ENSMUSG00000051224	Tceanc	4050	1.26054	0.86292	0.0024
ENSMUST00000060148	ENSMUSG00000021366	Hivep1	8753	7.4888	9.08637	0.00465
ENSMUST00000033930	ENSMUSG00000031530	Dusp4	2740	2.88216	5.85371	5e-05
ENSMUST00000023292	ENSMUSG00000022620	Arsa	2699	4.39381	3.06591	0.01585
ENSMUST00000048665	ENSMUSG00000056608	Chd9	11517	7.31157	10.0951	0.01245
ENSMUST00000018186	ENSMUSG00000018042	Cyb5r3	2422	18.6106	15.8234	0.02545
ENSMUST00000023741	ENSMUSG00000048154	Kmt2d	19823	3.95495	5.22813	0.0002
ENSMUST00000107425	ENSMUSG00000030609	Aen	4956	1.51511	2.02439	0.04845
ENSMUST00000124053	ENSMUSG00000064127	Med14	5129	3.81649	2.7115	0.02445
ENSMUST00000037678	ENSMUSG00000034371	Tkfc	2253	3.01392	2.27323	0.00635
ENSMUST00000101642	ENSMUSG00000020451	Limk2	3693	10.2183	14.0847	0.03245
ENSMUST00000020580	ENSMUSG00000020329	Polrmt	3755	3.94702	4.84794	0.03515
ENSMUST00000027916	ENSMUSG00000026617	Bpnt1	2200	22.4618	26.658	0.0193
ENSMUST00000041618	ENSMUSG00000039117	Taf4a	4416	2.32959	2.86992	0.04005
ENSMUST00000120990	ENSMUSG00000051041	Olfml1	1685	5.86505	4.79559	0.02935
ENSMUST00000041589	ENSMUSG00000037573	Tob1	2288	12.2559	10.1424	0.0132
ENSMUST00000049621	ENSMUSG00000048001	Hes5	1273	12.7733	10.6493	0.0344
ENSMUST00000180062	ENSMUSG00000016918	Sulf1	4636	1.08314	1.98981	0.0084
ENSMUST00000045068	ENSMUSG00000039714	Cplx3	2832	4.57633	3.74621	0.02155
ENSMUST00000049628	ENSMUSG00000050856	Atp5k	371	735.785	842.961	0.0432
ENSMUST00000020109	ENSMUSG00000019948	Actr6	1703	14.6699	17.1393	0.04015
ENSMUST00000095017	ENSMUSG00000042508	Dmtf1	3498	5.43291	8.39354	0.0034
ENSMUST00000032194	ENSMUSG00000030103	Bhlhe40	3113	22.4473	35.4992	5e-05
ENSMUST00000036418	ENSMUSG00000038550	Ciart	1398	10.3445	6.61885	0.00315
ENSMUST00000050004	ENSMUSG00000033107	Rnf125	1334	0.916157	1.32219	0.03275
ENSMUST00000179331	ENSMUSG00000030655	Smg1	12340	0.785603	1.94709	0.04725
ENSMUST00000001181	ENSMUSG00000020241	Col6a2	3949	2.60403	2.09832	0.03605
ENSMUST00000127401	ENSMUSG00000001918	Slc1a5	2807	0.198873	0.428386	0.0158
ENSMUST00000059997	ENSMUSG00000045838	A430105I19Rik	4703	2.09279	1.64199	0.0079
ENSMUST00000058135	ENSMUSG00000047227	Gm527	1463	4.35195	5.29711	0.0489
ENSMUST00000202326	ENSMUSG00000029608	Rph3a	2621	11.0749	17.7804	0.0038
ENSMUST00000001055	ENSMUSG00000001029	Icam2	1282	1.80571	2.44384	0.0272
ENSMUST00000139731	ENSMUSG00000020832	Eral1	2131	1.36852	2.2492	0.04235
ENSMUST00000156844	ENSMUSG00000078875	Gm14419	752	12.3296	17.263	0.003
ENSMUST00000036300	ENSMUSG00000045672	Col27a1	7612	0.459312	0.333376	0.03885
ENSMUST00000099157	ENSMUSG00000025402	Nab2	2311	0.961677	2.31105	0.0272
ENSMUST00000190387	ENSMUSG00000040563	Lppr2	2608	4.43207	2.94515	0.0468
ENSMUST00000077290	ENSMUSG00000025823	Pdia4	2399	24.3931	36.1379	5e-05
ENSMUST00000109820	ENSMUSG00000007659	Bcl2l1	2568	1.93751	4.16085	0.0498
ENSMUST00000021425	ENSMUSG00000021037	Ahsa1	1347	86.9371	104.173	0.0053
ENSMUST00000137953	ENSMUSG00000001909	Trmt1	3647	2.58658	1.41657	0.0498
ENSMUST00000081989	ENSMUSG00000063760	Rnf217	11013	5.46318	6.52006	0.00855
ENSMUST00000062149	ENSMUSG00000020642	Rnf144a	5089	6.79032	5.58499	0.01235
ENSMUST00000021077	ENSMUSG00000020733	Slc9a3r1	1925	15.3273	13.1798	0.04855
ENSMUST00000029707	ENSMUSG00000028069	Gpatch4	1630	7.33346	5.62463	0.0051
ENSMUST00000106921	ENSMUSG00000057722	Lepr	5542	0.890826	1.18424	0.01435
ENSMUST00000088615	ENSMUSG00000067851	Arfgef1	6978	20.1183	23.4808	0.02185
ENSMUST00000039234	ENSMUSG00000040410	Fbxl4	2546	12.3752	10.4147	0.0318
ENSMUST00000048982	ENSMUSG00000036158	Prickle1	4085	20.7553	25.8958	0.0017
ENSMUST00000057288	ENSMUSG00000020571	Pdia6	2175	61.2855	85.9867	5e-05
ENSMUST00000109221	ENSMUSG00000017929	B4galt5	4210	9.79785	12.5067	0.00085
ENSMUST00000028494	ENSMUSG00000027088	Phospho2	2260	13.3182	17.8083	0.0003
ENSMUST00000053902	ENSMUSG00000035151	Elmod2	4319	3.62779	4.43389	0.03415
ENSMUST00000021271	ENSMUSG00000020893	Per1	4671	5.08529	7.83039	5e-05
ENSMUST00000088585	ENSMUSG00000016918	Sulf1	4630	1.95124	1.23314	0.0223
